# Supplementary material for: Metabolomic Analysis Reveals Contributions of Citric and Citramalic Acids to Rare Earth Bioleaching by a Paecilomyces Fungus
Source: Front Microbiol. 2020 Jan 14;10:3008. doi: 10.3389/fmicb.2019.03008 (PMC6971059; doi:10.3389/fmicb.2019.03008)
Supplement: Supplementary file 2 [file Table_1.XLSX]

## Sheet: metabolite_identifications
Supplementary Table 1: Detected metabolite compound identifications.
BinBase compound name	retention index	quantification mz	BinBase id	InChI Key	mass spectrum (formatted as m/z:intensity values)
xylulose NIST	553450	173	31632	ZAQJHHRNXZUBTE-WVZVXSGGSA-N	85:1861.0 86:702.0 87:1148.0 88:324.0 89:10095.0 90:1041.0 91:452.0 94:60.0 95:96.0 96:155.0 97:114.0 98:195.0 99:528.0 100:1225.0 101:2618.0 102:774.0 103:9082.0 104:930.0 106:381.0 108:16.0 109:127.0 110:14.0 111:327.0 112:10.0 113:567.0 114:3170.0 115:1092.0 116:1102.0 117:15978.0 118:1867.0 119:1700.0 120:3.0 125:55.0 126:826.0 128:264.0 129:1798.0 130:91.0 131:1527.0 132:491.0 133:5046.0 134…
xylose	543267	103	169	SRBFZHDQGSBBOR-LECHCGJUSA-N	86:77.0 87:118.0 89:838.0 90:80.0 91:46.0 94:19.0 96:63.0 98:48.0 99:37.0 100:186.0 101:192.0 102:469.0 103:7719.0 104:659.0 105:379.0 106:26.0 112:23.0 114:254.0 115:75.0 117:652.0 118:60.0 119:80.0 120:23.0 121:17.0 124:30.0 127:70.0 128:49.0 129:515.0 130:102.0 131:344.0 133:894.0 134:104.0 135:66.0 137:49.0 142:48.0 143:43.0 144:51.0 145:65.0 147:2699.0 148:283.0 149:250.0 151:31.0 155:21.0 1…
xylonolactone NIST	535176	217	1808	XXBSUZSONOQQGK-FLRLBIABSA-N	86:6.0 88:17.0 89:5.0 101:53.0 103:590.0 104:3.0 107:94.0 109:11.0 115:14.0 117:33.0 119:41.0 129:448.0 131:202.0 132:16.0 133:173.0 134:3.0 135:35.0 141:31.0 142:3.0 143:208.0 144:4.0 145:90.0 147:1035.0 148:163.0 149:112.0 159:13.0 169:60.0 177:13.0 183:7.0 184:36.0 185:1.0 189:245.0 190:54.0 191:253.0 194:11.0 199:18.0 207:671.0 208:114.0 209:52.0 215:200.0 217:4500.0 218:698.0 219:375.0 220:2…
xylitol	567437	217	5857	HEBKCHPVOIAQTA-NGQZWQHPSA-N	85:22.0 87:53.0 88:95.0 89:312.0 94:15.0 99:38.0 101:376.0 103:3875.0 104:345.0 105:78.0 107:25.0 108:24.0 110:68.0 113:18.0 115:63.0 116:117.0 117:1418.0 118:103.0 119:73.0 129:1604.0 130:163.0 131:367.0 132:26.0 133:712.0 135:29.0 142:33.0 143:88.0 147:3295.0 148:560.0 149:319.0 155:12.0 157:214.0 159:20.0 163:58.0 169:22.0 171:40.0 175:99.0 182:58.0 189:476.0 190:74.0 191:333.0 192:19.0 193:15…
uracil	385816	241	3023	ISAKRJDGNUQOIC-UHFFFAOYSA-N	85:7501.0 86:34329.0 87:5443.0 88:5529.0 89:1245.0 90:1710.0 91:2717.0 92:617.0 93:270.0 94:231.0 95:475.0 96:1929.0 97:2207.0 98:3686.0 99:85531.0 100:33488.0 101:12996.0 102:3481.0 103:1997.0 104:1436.0 105:2735.0 106:983.0 107:414.0 108:869.0 109:2764.0 110:7455.0 111:1656.0 112:1145.0 113:21290.0 114:3514.0 115:2496.0 116:1970.0 117:3949.0 118:6193.0 119:1613.0 120:1089.0 121:286.0 122:287.0 …
UDP-glucuronic acid	585473	217	21705	HDYANYHVCAPMJV-LXQIFKJMSA-N	85:836.0 86:140.0 89:1123.0 90:104.0 91:79.0 93:59.0 95:150.0 97:257.0 98:49.0 99:769.0 100:56.0 101:10488.0 102:871.0 103:3819.0 104:238.0 105:458.0 107:72.0 108:6.0 109:366.0 111:1096.0 112:28.0 113:631.0 114:58.0 115:828.0 116:9417.0 117:6717.0 118:797.0 119:682.0 120:43.0 121:42.0 122:1.0 123:812.0 124:139.0 125:97.0 126:23.0 127:433.0 129:8544.0 130:854.0 131:1568.0 132:223.0 133:3913.0 134:…
tyrosol	510842	179	100888	YCCILVSKPBXVIP-UHFFFAOYSA-N	85:805.0 86:240.0 87:781.0 88:1255.0 89:4759.0 92:585.0 94:111.0 100:69.0 102:2214.0 103:25928.0 104:3146.0 105:2603.0 106:474.0 107:744.0 108:34.0 109:532.0 111:360.0 116:1577.0 120:338.0 121:1138.0 122:218.0 123:179.0 125:94.0 126:2814.0 127:854.0 128:293.0 129:502.0 132:34.0 133:1181.0 135:2996.0 138:71.0 139:53.0 140:51.0 142:66.0 149:3188.0 150:697.0 151:2875.0 152:338.0 153:209.0 155:10.0 1…
trans-4-hydroxy-L-proline	457910	158	19910	PMMYEEVYMWASQN-DMTCNVIQSA-N	115:255.0 130:36.0 143:101.0 157:82.0 158:1224.0
threitol	467595	217	770	UNXHWFMMPAWVPI-QWWZWVQMSA-N	85:123.0 86:39.0 87:235.0 88:92.0 89:794.0 91:41.0 92:65.0 93:48.0 94:22.0 97:38.0 101:1040.0 102:87.0 103:5119.0 104:409.0 105:302.0 106:38.0 112:26.0 113:47.0 114:17.0 115:225.0 116:875.0 117:3651.0 118:353.0 119:290.0 129:736.0 131:620.0 132:62.0 133:1389.0 134:137.0 135:41.0 143:141.0 145:31.0 147:6122.0 148:886.0 149:553.0 151:42.0 165:22.0 175:40.0 189:971.0 190:191.0 191:521.0 192:94.0 193…
tagatose	627414	307	16813	BJHIKXHVCXFQLS-PQLUHFTBSA-N	86:98.0 89:2433.0 90:52.0 100:571.0 103:21582.0 104:1949.0 105:850.0 110:64.0 113:20.0 114:86.0 117:1212.0 142:44.0 163:412.0 164:32.0 172:447.0 173:138.0 174:51.0 184:57.0 189:815.0 190:116.0 197:21.0 200:10.0 201:114.0 202:65.0 205:222.0 214:112.0 216:35.0 217:8093.0 218:1576.0 219:397.0 220:34.0 221:96.0 225:24.0 244:27.0 256:36.0 261:19.0 262:14.0 263:50.0 275:42.0 277:708.0 278:223.0 279:88.…
sulfuric acid	282411	227	12266	QAOWNCQODCNURD-UHFFFAOYSA-N	85:304.0 87:1338.0 89:427.0 90:627.0 91:2568.0 92:299.0 93:437.0 94:219.0 95:38.0 98:17.0 100:576.0 102:801.0 103:2654.0 104:808.0 105:1171.0 106:909.0 107:6785.0 108:162.0 109:273.0 110:3976.0 114:441.0 115:1666.0 116:60.0 117:1133.0 118:2283.0 119:883.0 120:398.0 123:90.0 124:26.0 129:38.0 130:9958.0 131:5448.0 132:1296.0 133:3074.0 134:11823.0 135:2694.0 136:426.0 137:183.0 138:26.0 139:1384.0…
sucrose	915139	271	173	CZMRCDWAGMRECN-UGDNZRGBSA-N	85:319.0 87:314.0 88:197.0 89:406.0 91:85.0 92:24.0 94:41.0 97:89.0 99:203.0 100:65.0 101:688.0 102:331.0 103:8357.0 104:731.0 105:421.0 108:21.0 109:428.0 110:53.0 111:276.0 112:52.0 113:277.0 114:83.0 115:331.0 116:305.0 117:1934.0 118:199.0 119:119.0 122:42.0 124:17.0 125:110.0 127:383.0 128:152.0 129:5742.0 130:735.0 131:1008.0 132:97.0 133:1861.0 134:253.0 135:207.0 136:48.0 138:21.0 139:138…
succinic acid	370608	247	161	KDYFGRWQOYBRFD-UHFFFAOYSA-N	85:303.0 87:764.0 88:359.0 89:340.0 91:55.0 92:42.0 95:84.0 98:86.0 99:324.0 101:577.0 102:330.0 103:701.0 104:172.0 105:342.0 106:78.0 107:93.0 111:30.0 113:629.0 114:213.0 115:891.0 116:1231.0 117:1124.0 118:170.0 119:320.0 120:104.0 124:22.0 126:77.0 128:196.0 129:6064.0 130:1045.0 131:1466.0 132:345.0 133:2204.0 135:234.0 136:65.0 137:16.0 138:15.0 142:39.0 143:223.0 145:378.0 147:57887.0 148…
stearic acid	787622	117	13	QIQXTHQIDYTFRH-UHFFFAOYSA-N	85:4191.0 86:1569.0 87:1271.0 88:840.0 89:3341.0 90:339.0 91:1247.0 92:198.0 93:2558.0 94:311.0 95:7043.0 96:882.0 97:6832.0 98:5171.0 99:2925.0 100:405.0 101:1507.0 102:583.0 103:508.0 104:58.0 105:3188.0 106:306.0 107:1125.0 108:164.0 109:2130.0 110:377.0 111:3168.0 112:1361.0 113:512.0 114:158.0 115:1020.0 116:7267.0 117:126653.0 118:11937.0 119:4908.0 120:246.0 121:958.0 122:149.0 123:575.0 1…
sorbitol	667922	217	162	FBPFZTCFMRRESA-JGWLITMVSA-N	85:588.0 86:704.0 88:1768.0 89:8743.0 90:652.0 91:1094.0 92:168.0 93:127.0 94:89.0 97:2807.0 98:1048.0 99:1610.0 100:506.0 101:5089.0 102:848.0 103:48732.0 104:4923.0 105:2703.0 106:215.0 109:509.0 110:185.0 111:1108.0 112:146.0 113:1262.0 114:181.0 115:2342.0 116:957.0 117:28648.0 118:2694.0 119:2266.0 120:260.0 121:427.0 123:238.0 124:184.0 125:365.0 126:341.0 127:1107.0 129:20376.0 130:3176.0 …
shikimic acid	608627	204	16626	JXOHGGNKMLTUBP-HSUXUTPPSA-N	86:76.0 91:101.0 93:273.0 94:49.0 95:22.0 97:6.0 98:40.0 99:70.0 101:390.0 102:32.0 103:328.0 104:72.0 105:352.0 109:291.0 110:143.0 111:149.0 113:54.0 114:22.0 116:347.0 117:411.0 119:176.0 121:28.0 122:30.0 123:152.0 124:53.0 125:105.0 126:93.0 129:304.0 131:747.0 133:1535.0 134:237.0 135:312.0 137:38.0 139:29.0 141:259.0 142:55.0 143:109.0 145:157.0 147:6678.0 148:1009.0 149:438.0 150:28.0 151…
s(-)-willardiine	815363	204	4716	FACUYWPMDKTVFU-BYPYZUCNSA-N	85:77.0 86:140.0 89:384.0 96:17.0 98:73.0 99:66.0 101:781.0 103:4022.0 104:306.0 105:187.0 107:21.0 110:6.0 113:135.0 116:107.0 117:1203.0 122:64.0 123:16.0 124:2.0 125:11.0 127:4.0 128:52.0 129:1442.0 131:555.0 133:504.0 140:58.0 141:26.0 142:251.0 143:284.0 145:34.0 146:22.0 147:4740.0 148:464.0 149:308.0 152:6.0 153:27.0 154:57.0 155:99.0 156:439.0 157:121.0 158:103.0 159:618.0 160:204.0 161:2…
ribose-5-phosphate	731837	315	42024	PPQRONHOSHZGFQ-LMVFSUKVSA-L	85:189.0 86:378.0 87:1160.0 88:245.0 89:3232.0 90:545.0 91:37.0 92:186.0 94:298.0 95:7.0 97:123.0 98:406.0 99:524.0 100:844.0 101:3809.0 102:711.0 104:940.0 105:755.0 106:90.0 107:17.0 108:2.0 109:48.0 110:336.0 111:220.0 112:103.0 113:67.0 114:478.0 115:1219.0 116:990.0 117:1383.0 119:30.0 121:41.0 122:20.0 126:874.0 127:283.0 128:319.0 129:551.0 130:2894.0 131:5342.0 132:288.0 134:85.0 135:620.…
ribose	553135	217	1662	HMFHBZSHGGEWLO-SOOFDHNKSA-N	85:8071.0 86:9472.0 87:11706.0 88:7002.0 89:91105.0 90:8121.0 91:4369.0 92:716.0 93:150.0 94:1908.0 95:1008.0 96:977.0 97:1171.0 98:3992.0 99:8420.0 100:38767.0 101:35431.0 102:21246.0 103:1062555.0 104:101843.0 105:73545.0 106:4592.0 107:540.0 108:433.0 109:560.0 110:342.0 111:3649.0 112:4750.0 113:10117.0 114:23592.0 115:17668.0 116:13805.0 117:109230.0 118:11975.0 119:17425.0 120:1771.0 121:10…
ribonic acid	599680	292	1683	QXKAIJAYHKCRRA-BXXZVTAOSA-N	85:227.0 86:88.0 87:301.0 88:189.0 89:1714.0 90:165.0 92:75.0 93:53.0 98:147.0 99:481.0 100:3713.0 101:2153.0 102:4583.0 103:29677.0 104:2992.0 105:1403.0 110:143.0 111:44.0 112:63.0 113:396.0 114:93.0 115:933.0 116:854.0 117:9305.0 118:835.0 119:929.0 120:54.0 121:81.0 123:25.0 124:12.0 125:90.0 126:47.0 127:17.0 128:340.0 129:5571.0 130:3345.0 131:4080.0 132:826.0 133:8223.0 134:602.0 135:562.0…
ribitol	575497	217	7362	HEBKCHPVOIAQTA-NGQZWQHPSA-N	85:248.0 86:43.0 87:65.0 88:62.0 89:897.0 90:98.0 92:20.0 95:22.0 99:113.0 100:224.0 101:774.0 102:28.0 103:6316.0 104:624.0 105:415.0 107:35.0 109:433.0 110:374.0 111:71.0 112:1.0 113:273.0 114:80.0 115:19.0 116:274.0 117:7478.0 118:701.0 119:297.0 126:2.0 128:44.0 129:3713.0 130:874.0 131:1633.0 132:149.0 133:1838.0 134:180.0 135:129.0 136:1.0 140:1.0 142:152.0 143:478.0 145:98.0 146:11.0 147:7…
pyruvic acid	211668	174	583	LCTONWCANYUPML-UHFFFAOYSA-N	86:1271.0 87:3393.0 88:4939.0 89:36864.0 90:3575.0 91:1545.0 99:11670.0 100:9133.0 101:3760.0 102:2314.0 111:260.0 112:118.0 114:1389.0 115:16515.0 116:2607.0 117:44546.0 118:6205.0 119:2711.0 128:303.0 129:840.0 131:2446.0 133:6730.0 143:730.0 144:225.0 145:87.0 149:5066.0 150:761.0 154:28.0 157:97.0 158:2571.0 159:990.0 160:146.0 168:28.0 169:66.0 174:40280.0 175:5050.0 176:1835.0 181:83.0 182:…
putrescine	588119	174	21703	KIDHWZJUCRJVML-UHFFFAOYSA-N	85:624.0 86:17614.0 87:1954.0 88:701.0 95:37.0 96:1.0 97:93.0 98:646.0 99:2310.0 100:8640.0 101:1171.0 102:973.0 103:9.0 110:382.0 111:26.0 112:811.0 113:463.0 114:1772.0 115:664.0 116:1599.0 117:894.0 118:197.0 124:16.0 125:39.0 126:2092.0 127:226.0 128:1088.0 129:243.0 130:4521.0 131:1582.0 132:862.0 140:655.0 141:77.0 142:1872.0 143:265.0 144:500.0 145:66.0 146:2422.0 153:32.0 156:175.0 158:65…
propane-1,3-diol NIST	214380	177	282	YPFDHNVEDLHUCE-UHFFFAOYSA-N	85:801.0 86:145.0 87:673.0 99:342.0 100:269.0 101:1134.0 102:390.0 103:1442.0 104:191.0 105:263.0 113:55.0 115:7165.0 116:474.0 119:330.0 129:59.0 130:5199.0 131:1969.0 133:1784.0 135:367.0 145:32.0 147:17505.0 148:2962.0 149:1307.0 150:157.0 151:34.0 163:52.0 164:30.0 176:36.0 177:1417.0 178:147.0 179:81.0 180:21.0 183:38.0 186:23.0 192:22.0 201:32.0 203:21.0 205:278.0 213:45.0 227:17.0 231:24.0…
phosphate	345365	314	4	NBIIXXVUZAFLBC-UHFFFAOYSA-K	85:2157.0 86:4845.0 87:5305.0 88:1544.0 89:6178.0 90:913.0 91:5486.0 92:639.0 93:1090.0 94:256.0 95:178.0 96:901.0 97:221.0 98:1216.0 99:626.0 100:3524.0 103:17906.0 104:4250.0 105:12326.0 106:1911.0 107:7514.0 108:751.0 109:2429.0 110:239.0 112:225.0 113:1044.0 114:607.0 115:23611.0 116:3246.0 117:2166.0 118:1082.0 119:15220.0 120:2183.0 121:11456.0 122:1330.0 123:5152.0 124:478.0 125:397.0 126:…
pelargonic acid	399229	117	50	FBUKVWPVBMHYJY-UHFFFAOYSA-N	85:95.0 86:236.0 88:109.0 89:242.0 90:68.0 94:18.0 95:61.0 96:43.0 98:137.0 99:208.0 101:214.0 102:71.0 105:367.0 116:364.0 117:7457.0 118:623.0 119:191.0 123:20.0 128:63.0 129:2753.0 130:235.0 131:2172.0 132:1576.0 133:343.0 143:171.0 144:20.0 145:577.0 146:129.0 149:75.0 150:22.0 157:39.0 159:78.0 171:92.0 172:28.0 187:106.0 201:79.0 215:2429.0 216:383.0 217:112.0 221:143.0 222:38.0 252:13.0 25…
p-cresol	280360	165	16321	IWDCLRJOBJJRNH-UHFFFAOYSA-N	85:286.0 86:127.0 89:1119.0 90:283.0 91:12035.0 92:977.0 93:220.0 95:661.0 97:48.0 100:35.0 101:41.0 102:3.0 103:566.0 104:194.0 105:1358.0 106:129.0 107:939.0 108:174.0 109:1304.0 110:198.0 111:8.0 116:61.0 119:166.0 120:79.0 121:303.0 122:20.0 123:105.0 127:98.0 130:438.0 131:212.0 132:26.0 133:15.0 134:340.0 135:3194.0 136:474.0 137:541.0 138:60.0 145:240.0 146:84.0 147:687.0 148:91.0 149:1552…
palmitic acid	713809	313	11	IPCSVZSSVZVIGE-UHFFFAOYSA-N	85:5547.0 86:2174.0 87:1945.0 88:1374.0 89:4967.0 90:773.0 91:1518.0 92:318.0 93:3798.0 94:511.0 95:10592.0 96:1486.0 97:8747.0 98:6953.0 99:4528.0 100:714.0 101:2700.0 102:872.0 103:543.0 105:5528.0 106:406.0 107:1555.0 108:180.0 109:2908.0 110:516.0 111:3724.0 112:1696.0 113:834.0 114:115.0 115:1629.0 116:11477.0 117:187825.0 118:18078.0 119:7322.0 120:225.0 121:1203.0 122:69.0 123:876.0 124:28…
oxalic acid	260513	190	4923	MUBZPKHOEPUJKR-UHFFFAOYSA-N	85:642.0 86:564.0 88:852.0 89:2725.0 90:394.0 91:354.0 92:72.0 93:452.0 95:374.0 99:782.0 100:169.0 101:3135.0 102:7162.0 103:10813.0 104:1629.0 105:3087.0 106:416.0 107:839.0 108:169.0 109:471.0 110:173.0 111:137.0 113:787.0 114:94.0 115:3681.0 116:1325.0 117:6042.0 118:1002.0 119:1067.0 120:91.0 121:33.0 122:65.0 123:314.0 124:97.0 125:300.0 129:68.0 130:184.0 131:11895.0 132:2017.0 133:14362.0…
oleic acid	779120	339	43	ZQPPMHVWECSIRJ-KTKRTIGZSA-N	85:2268.0 86:703.0 87:608.0 88:472.0 89:1302.0 90:134.0 91:1987.0 92:342.0 93:2662.0 94:1268.0 95:7406.0 96:10672.0 97:6738.0 98:7712.0 99:1578.0 100:201.0 101:682.0 102:145.0 103:388.0 104:124.0 105:1450.0 106:261.0 107:1323.0 108:726.0 109:3302.0 110:3665.0 111:2689.0 112:1153.0 113:264.0 114:114.0 115:259.0 116:3180.0 117:34280.0 118:3347.0 119:2670.0 120:259.0 121:1238.0 122:553.0 123:2546.0 …
nicotinic acid	366992	180	285	PVNIIMVLHYAWGP-UHFFFAOYSA-N	85:402.0 86:47.0 87:81.0 90:191.0 91:76.0 94:43.0 99:36.0 100:31.0 103:50.0 105:288.0 106:4046.0 107:327.0 109:67.0 110:145.0 118:33.0 122:66.0 123:45.0 126:72.0 129:143.0 134:280.0 135:48.0 136:4959.0 137:603.0 138:162.0 139:22.0 153:17.0 156:104.0 158:16.0 160:19.0 165:17.0 166:29.0 167:25.0 171:18.0 175:13.0 179:34.0 180:4823.0 181:551.0 182:132.0 184:156.0 195:164.0 196:32.0 198:40.0 200:20.0…
myo-inositol	730022	305	1741	CDAISMWEOUEBRE-UHFFFAOYSA-N	85:113.0 86:491.0 87:31.0 88:19.0 89:298.0 90:43.0 95:6.0 99:170.0 100:411.0 101:320.0 102:164.0 103:3399.0 104:366.0 105:2.0 107:22.0 108:49.0 109:262.0 111:243.0 112:149.0 113:176.0 114:90.0 115:187.0 116:296.0 117:1042.0 118:228.0 119:212.0 121:1.0 123:6.0 124:38.0 125:22.0 126:73.0 127:67.0 128:163.0 129:4240.0 130:611.0 131:1566.0 132:262.0 133:3203.0 134:572.0 135:421.0 136:43.0 138:92.0 13…
maltotriose	1176972	361	22127		86:12.0 89:143.0 94:19.0 101:227.0 102:15.0 103:521.0 110:35.0 111:7.0 112:3.0 116:24.0 117:105.0 118:58.0 121:25.0 122:29.0 123:44.0 129:565.0 133:89.0 135:62.0 140:15.0 141:38.0 143:85.0 145:13.0 147:736.0 148:48.0 149:56.0 151:22.0 155:50.0 157:42.0 160:63.0 163:57.0 164:3.0 165:13.0 167:38.0 168:3.0 169:297.0 171:22.0 173:21.0 174:1.0 175:50.0 177:57.0 178:53.0 181:33.0 183:10.0 187:19.0 189:…
maltose	946601	204	1979	GUBGYTABKSRVRQ-UHFFFAOYSA-N	85:18.0 86:40.0 87:38.0 89:640.0 90:50.0 94:3.0 95:51.0 96:226.0 97:52.0 98:60.0 99:10.0 100:262.0 101:31.0 102:157.0 103:2571.0 104:171.0 105:231.0 108:7.0 109:86.0 111:17.0 112:13.0 113:130.0 114:62.0 116:82.0 117:1560.0 118:98.0 119:98.0 125:5.0 127:10.0 128:39.0 129:1849.0 130:331.0 131:223.0 132:24.0 133:813.0 134:81.0 140:25.0 141:77.0 142:107.0 143:428.0 145:58.0 147:3256.0 148:427.0 149:3…
malic acid	463180	233	1391	BJEPYKJPYRNKOW-UHFFFAOYSA-N	85:66.0 87:316.0 88:106.0 89:148.0 90:42.0 95:37.0 99:129.0 101:4462.0 102:488.0 103:641.0 104:93.0 105:294.0 115:533.0 116:432.0 117:2305.0 118:259.0 119:501.0 120:70.0 121:62.0 124:21.0 129:385.0 131:1945.0 132:129.0 133:6850.0 134:1075.0 135:667.0 136:51.0 137:33.0 139:20.0 142:41.0 143:745.0 144:107.0 145:145.0 147:21089.0 148:2969.0 149:2528.0 150:99.0 151:286.0 153:24.0 158:12.0 159:29.0 16…
lyxose	541086	217	85112	PYMYPHUHKUWMLA-UOWFLXDJSA-N	85:155.0 87:455.0 88:330.0 89:5647.0 90:390.0 94:48.0 96:79.0 99:377.0 100:2717.0 101:1492.0 102:600.0 103:35832.0 104:3052.0 105:1929.0 106:120.0 107:53.0 109:17.0 110:80.0 111:85.0 112:138.0 113:332.0 114:254.0 115:274.0 116:415.0 117:4160.0 118:270.0 119:534.0 121:96.0 126:187.0 127:203.0 128:129.0 129:3451.0 130:540.0 131:1760.0 133:4326.0 134:544.0 135:414.0 138:29.0 139:23.0 142:121.0 143:6…
lyxitol	573587	217	233	HEBKCHPVOIAQTA-QWWZWVQMSA-N	85:649.0 86:59.0 87:142.0 88:75.0 89:607.0 95:25.0 97:25.0 99:247.0 100:57.0 101:550.0 102:92.0 103:6136.0 104:480.0 105:198.0 106:44.0 111:98.0 112:73.0 113:193.0 114:48.0 115:140.0 116:225.0 117:3144.0 118:289.0 119:258.0 120:15.0 127:102.0 129:2235.0 130:260.0 131:777.0 133:1341.0 134:87.0 135:42.0 141:89.0 143:195.0 144:16.0 145:61.0 147:6082.0 148:964.0 149:538.0 150:39.0 151:43.0 157:231.0 …
levoglucosan	569637	204	3169	TWNIBLMWSKIRAT-VFUOTHLCSA-N	85:775.0 87:165.0 88:163.0 89:177.0 90:42.0 91:21.0 92:2.0 95:13.0 97:132.0 98:53.0 99:731.0 100:180.0 101:2830.0 102:212.0 103:5456.0 104:270.0 105:366.0 109:317.0 111:424.0 112:33.0 113:818.0 114:131.0 115:724.0 116:1575.0 117:3643.0 118:337.0 119:568.0 120:38.0 125:69.0 126:44.0 127:263.0 129:5991.0 130:703.0 131:1830.0 132:221.0 133:3867.0 134:297.0 135:293.0 136:48.0 139:2.0 140:20.0 141:67.…
lauric acid	547906	117	49	POULHZVOKOAJMA-UHFFFAOYSA-N	85:168.0 86:141.0 87:101.0 89:291.0 93:60.0 95:377.0 96:145.0 97:251.0 98:244.0 101:191.0 104:48.0 105:176.0 109:155.0 111:88.0 115:37.0 116:428.0 117:7512.0 118:665.0 119:226.0 120:42.0 122:42.0 129:2879.0 130:369.0 131:1222.0 132:1823.0 133:146.0 134:55.0 139:64.0 143:180.0 145:762.0 146:42.0 147:217.0 153:16.0 154:30.0 157:84.0 160:63.0 169:49.0 171:95.0 176:32.0 179:30.0 185:98.0 186:22.0 187…
lactulose	929908	204	6432	JCQLYHFGKNRPGE-FCVZTGTOSA-N	85:15.0 86:83.0 89:320.0 93:71.0 96:35.0 99:179.0 100:35.0 101:517.0 103:2907.0 104:50.0 105:154.0 109:103.0 113:221.0 114:90.0 115:12.0 116:235.0 117:787.0 118:124.0 124:47.0 126:14.0 129:3378.0 130:406.0 131:445.0 133:426.0 134:88.0 136:23.0 137:31.0 139:22.0 141:191.0 143:655.0 144:48.0 145:261.0 147:4074.0 148:387.0 149:168.0 150:56.0 153:61.0 155:144.0 156:88.0 157:219.0 158:34.0 159:34.0 16…
lactitol	959541	361	62247	VQHSOMBJVWLPSR-WUJBLJFYSA-N	85:15165.0 86:3999.0 87:9771.0 88:6313.0 89:90957.0 90:7984.0 91:5304.0 92:614.0 93:862.0 94:1584.0 95:2674.0 96:1615.0 97:15793.0 98:2935.0 99:12184.0 100:25041.0 101:32274.0 102:16565.0 103:350649.0 104:34478.0 105:29796.0 106:4794.0 107:1805.0 108:900.0 109:11519.0 110:2403.0 111:9672.0 112:2642.0 113:15560.0 114:7078.0 115:12952.0 116:16047.0 117:175394.0 118:18910.0 119:17415.0 120:1844.0 12…
lactic acid	217657	191	80	JVTAAEKCZFNVCJ-UHFFFAOYSA-N	85:8684.0 86:6573.0 87:72227.0 88:111565.0 89:22391.0 90:1554.0 91:2622.0 92:778.0 93:502.0 94:4760.0 95:1164.0 96:739.0 97:892.0 98:246.0 99:4891.0 100:2372.0 101:61750.0 102:48891.0 103:46949.0 104:6822.0 105:17397.0 106:1817.0 107:2274.0 108:297.0 109:91.0 111:450.0 113:4576.0 114:1039.0 115:35415.0 116:15880.0 117:1091636.0 118:122979.0 119:56962.0 120:3499.0 121:613.0 126:206.0 127:1515.0 12…
isothreonic acid	489385	292	1679	PXGPLTODNUVGFL-YNNPMVKQSA-N	85:304.0 86:391.0 88:631.0 89:4158.0 90:414.0 91:179.0 92:233.0 93:215.0 94:45.0 96:145.0 97:116.0 98:15.0 99:816.0 100:110.0 101:2762.0 102:21122.0 103:20966.0 104:2634.0 105:1408.0 106:64.0 107:560.0 108:290.0 109:71.0 110:395.0 111:105.0 113:1032.0 114:253.0 115:1508.0 116:877.0 117:33848.0 118:3267.0 119:2907.0 120:140.0 121:96.0 122:8.0 124:18.0 125:13.0 127:531.0 128:50.0 129:6995.0 130:178…
isocitric acid	617338	245	32122	ODBLHEXUDAPZAU-ZAFYKAAXSA-N	85:2447.0 86:626.0 87:1258.0 88:847.0 89:1234.0 90:260.0 91:1069.0 92:228.0 93:230.0 94:47.0 95:3308.0 97:857.0 98:490.0 99:1992.0 100:157.0 101:1347.0 102:1246.0 103:1778.0 104:706.0 105:2996.0 106:205.0 107:136.0 108:170.0 109:137.0 110:130.0 111:512.0 112:175.0 113:5118.0 114:643.0 115:1659.0 116:2844.0 117:4523.0 118:958.0 119:1389.0 120:194.0 121:151.0 122:61.0 123:48.0 124:33.0 125:32.0 126…
hydroxylamine	253158	146	4211	AVXURJPOCDRRFD-UHFFFAOYSA-N	85:497.0 86:2803.0 87:818.0 88:210.0 89:444.0 90:52.0 99:143.0 100:1769.0 101:310.0 102:90.0 103:289.0 113:392.0 114:359.0 115:278.0 116:400.0 117:769.0 118:165.0 119:4073.0 120:347.0 121:246.0 130:2689.0 131:1261.0 132:534.0 133:5379.0 134:778.0 135:325.0 140:17.0 144:46.0 145:193.0 146:4483.0 147:2330.0 148:211.0 160:124.0 161:218.0 171:38.0 172:25.0 177:32.0 178:25.0 187:27.0 188:34.0 204:99.0…
histidine	663739	154	6355	HNDVDQJCIGZPNO-YFKPBYRVSA-N	85:7094.0 86:1639.0 87:7991.0 88:4609.0 89:30905.0 90:3149.0 91:1902.0 92:234.0 93:454.0 94:653.0 95:1077.0 96:470.0 97:5959.0 98:1579.0 99:4516.0 100:4113.0 101:22182.0 102:4639.0 103:173841.0 104:18440.0 105:9083.0 106:915.0 107:452.0 108:270.0 109:579.0 110:700.0 111:3254.0 112:1304.0 113:5526.0 114:1030.0 115:5010.0 116:7143.0 117:101183.0 118:11323.0 119:8715.0 120:1052.0 121:713.0 122:103.0…
glycolic acid	227215	177	34086	AEMRFAOFKBGASW-UHFFFAOYSA-N	87:1425.0 92:213.0 93:59.0 94:53.0 100:1068.0 101:928.0 102:746.0 103:3767.0 104:374.0 105:894.0 106:225.0 109:62.0 115:803.0 116:336.0 119:879.0 120:116.0 121:21.0 133:7528.0 137:4.0 152:79.0 153:20.0 154:42.0 156:71.0 157:41.0 158:44.0 160:65.0 161:3953.0 162:856.0 163:458.0 164:50.0 165:50.0 166:7.0 168:24.0 173:188.0 175:46.0 176:27.0 177:10553.0 178:1655.0 179:815.0 180:109.0 182:15.0 184:77…
glycerol-alpha-phosphate	590747	357	1687	AWUCVROLDVIAJX-UHFFFAOYSA-N	85:750.0 87:846.0 88:468.0 89:1193.0 90:82.0 91:168.0 92:114.0 93:127.0 94:26.0 95:116.0 97:212.0 98:232.0 99:483.0 101:13348.0 102:1461.0 103:9463.0 104:991.0 105:689.0 106:35.0 107:239.0 108:36.0 109:51.0 111:385.0 113:2220.0 114:284.0 115:2195.0 116:2414.0 117:2066.0 118:407.0 119:755.0 120:59.0 121:349.0 122:90.0 123:101.0 125:30.0 127:73.0 129:6764.0 130:1365.0 131:6671.0 132:512.0 133:8224.…
glycerol-3-galactoside	800205	204	100875	NHJUPBDCSOGIKX-NTXXKDEISA-N	85:119.0 86:50.0 88:92.0 89:704.0 90:63.0 97:170.0 99:209.0 101:1588.0 102:180.0 103:7466.0 104:638.0 105:274.0 113:140.0 114:16.0 115:228.0 116:505.0 117:2068.0 118:19.0 119:111.0 129:3086.0 130:248.0 131:1536.0 132:221.0 133:1744.0 135:112.0 136:31.0 141:23.0 143:419.0 144:45.0 147:6254.0 148:466.0 149:464.0 150:25.0 158:13.0 159:168.0 169:405.0 172:18.0 175:156.0 189:502.0 190:237.0 191:1005.0…
glycerol	344466	205	30	PEDCQBHIVMGVHV-UHFFFAOYSA-N	85:1069.0 86:1979.0 87:2157.0 88:1086.0 89:5466.0 90:494.0 91:283.0 94:134.0 97:170.0 99:483.0 100:547.0 101:7688.0 102:1229.0 103:30772.0 104:2994.0 105:1697.0 106:143.0 108:135.0 109:140.0 111:130.0 112:89.0 113:993.0 114:232.0 115:2539.0 116:2329.0 117:35562.0 118:3659.0 119:3831.0 120:444.0 121:441.0 122:107.0 123:185.0 124:113.0 128:225.0 129:5116.0 130:612.0 131:6207.0 132:1094.0 133:25238.…
glyceric acid	377495	189	48	RBNPOMFGQQGHHO-UHFFFAOYSA-N	87:199.0 89:698.0 90:111.0 93:56.0 98:33.0 99:176.0 100:63.0 101:1315.0 102:3672.0 103:4054.0 104:371.0 105:293.0 106:106.0 107:60.0 108:48.0 113:36.0 114:94.0 115:261.0 116:366.0 117:2480.0 119:409.0 122:34.0 130:941.0 131:1036.0 133:4658.0 135:416.0 142:23.0 147:8908.0 148:1388.0 149:813.0 157:22.0 158:22.0 159:33.0 161:42.0 162:30.0 163:86.0 166:42.0 175:382.0 176:31.0 177:220.0 189:3993.0 190…
glutaric acid	421596	261	16952	JFCQEDHGNNZCLN-UHFFFAOYSA-N	85:4857.0 86:408.0 87:632.0 88:1429.0 89:752.0 92:72.0 93:162.0 94:11.0 95:581.0 97:15164.0 98:1176.0 99:2227.0 101:4169.0 102:981.0 103:27.0 106:67.0 107:367.0 110:432.0 111:140.0 113:709.0 114:83.0 115:2230.0 116:9480.0 117:5385.0 118:622.0 119:88.0 123:1269.0 124:368.0 126:294.0 127:328.0 128:231.0 129:14698.0 130:6115.0 131:3690.0 132:878.0 133:5237.0 138:106.0 140:284.0 141:16.0 142:59.0 143…
glucose-1-phosphate	594647	217	3167	HXXFSFRBOHSIMQ-GASJEMHNSA-N	85:385.0 86:98.0 87:248.0 88:286.0 89:468.0 90:224.0 92:20.0 95:218.0 99:284.0 101:1180.0 103:1916.0 104:47.0 107:220.0 109:96.0 110:193.0 111:260.0 112:20.0 113:386.0 114:41.0 115:209.0 116:863.0 117:2309.0 118:189.0 119:243.0 125:12.0 126:151.0 128:127.0 129:1571.0 130:306.0 131:508.0 132:123.0 133:2331.0 134:352.0 135:130.0 136:1.0 139:40.0 140:858.0 141:105.0 142:138.0 143:915.0 144:125.0 145…
glucose	675179	217	71	WQZGKKKJIJFFOK-VFUOTHLCSA-N	88:65.0 89:1335.0 90:95.0 91:159.0 92:42.0 94:44.0 96:80.0 97:138.0 99:306.0 101:314.0 102:63.0 103:2308.0 104:201.0 105:249.0 106:37.0 109:105.0 110:107.0 111:113.0 112:49.0 113:111.0 114:132.0 115:246.0 116:252.0 117:1574.0 119:155.0 122:39.0 127:37.0 129:1861.0 130:640.0 131:664.0 132:299.0 133:1039.0 134:215.0 135:117.0 138:39.0 139:39.0 140:20.0 143:315.0 144:54.0 145:275.0 146:83.0 147:2302…
gluconic acid	693148	333	7501	RGHNJXZEOKUKBD-UHFFFAOYSA-N	87:39.0 89:155.0 99:15.0 100:306.0 101:268.0 102:393.0 103:2729.0 104:264.0 105:196.0 109:2.0 111:2.0 113:144.0 116:8.0 117:1117.0 118:12.0 127:30.0 129:1186.0 130:285.0 131:546.0 132:183.0 133:997.0 134:13.0 137:1.0 139:7.0 140:38.0 141:4.0 142:28.0 143:746.0 144:263.0 145:25.0 147:6161.0 148:1144.0 149:642.0 150:39.0 151:46.0 153:74.0 154:66.0 155:3.0 157:599.0 159:89.0 160:27.0 161:88.0 164:14…
galactinol	1002731	204	1982	VCWMRQDBPZKXKG-UHFFFAOYSA-N	85:14.0 88:39.0 95:8.0 96:11.0 97:10.0 98:2.0 99:1.0 101:52.0 103:629.0 105:43.0 109:1.0 113:44.0 115:2.0 116:54.0 117:44.0 119:28.0 121:1.0 123:1.0 125:1.0 129:681.0 130:1.0 131:231.0 133:66.0 143:15.0 144:7.0 147:786.0 148:33.0 149:15.0 155:33.0 156:29.0 157:47.0 169:102.0 170:2.0 175:18.0 177:48.0 179:14.0 181:24.0 183:31.0 185:1.0 189:110.0 190:27.0 191:1094.0 192:336.0 193:152.0 199:3.0 203:…
fumaric acid	390016	245	14755	VZCYOOQTPOCHFL-OWOJBTEDSA-N	85:387.0 86:38.0 87:9.0 88:13.0 89:36.0 91:8.0 92:19.0 93:21.0 94:2.0 95:36.0 96:23.0 97:35.0 98:167.0 99:149.0 100:30.0 101:19.0 102:3.0 103:106.0 104:6.0 105:54.0 106:32.0 108:1.0 109:14.0 111:16.0 113:179.0 114:8.0 115:714.0 116:73.0 117:197.0 118:25.0 119:46.0 120:15.0 121:3.0 122:5.0 123:4.0 125:11.0 126:132.0 127:348.0 128:131.0 129:57.0 130:40.0 131:175.0 132:35.0 133:1168.0 134:224.0 135:…
fructose	639442	307	21	RFSUNEUAIZKAJO-ARQDHWQXSA-N	85:1065.0 86:372.0 87:1570.0 88:1347.0 89:11886.0 90:1027.0 91:450.0 94:125.0 95:108.0 96:150.0 97:341.0 98:337.0 99:854.0 100:2150.0 101:3537.0 102:951.0 103:87115.0 104:8453.0 105:4107.0 106:219.0 110:160.0 111:332.0 112:91.0 113:824.0 114:1370.0 115:1277.0 116:899.0 117:11742.0 118:1067.0 119:1473.0 120:185.0 121:95.0 124:47.0 125:43.0 126:175.0 127:390.0 129:7908.0 130:1485.0 131:4620.0 132:6…
erythronic acid	512029	217	3171	JPIJQSOTBSSVTP-PWNYCUMCSA-N	85:102.0 86:274.0 87:196.0 88:324.0 89:5685.0 90:514.0 91:237.0 99:139.0 100:1920.0 101:1375.0 102:1362.0 103:5061.0 104:563.0 105:280.0 110:631.0 111:141.0 113:69.0 114:64.0 115:554.0 116:574.0 117:10253.0 118:1187.0 119:557.0 128:214.0 129:2850.0 130:1365.0 131:1461.0 132:327.0 133:3475.0 134:870.0 135:138.0 136:110.0 141:217.0 142:340.0 143:1359.0 144:465.0 145:285.0 146:38.0 147:21746.0 148:3…
erythritol	471922	217	92	UNXHWFMMPAWVPI-ZXZARUISSA-N	86:57.0 87:443.0 89:682.0 90:92.0 99:480.0 100:41.0 101:1823.0 103:7046.0 104:676.0 105:300.0 106:59.0 109:27.0 111:45.0 113:474.0 115:473.0 116:1861.0 117:6123.0 118:476.0 119:295.0 127:453.0 129:1559.0 130:129.0 131:448.0 133:1902.0 134:216.0 144:53.0 147:9776.0 148:785.0 149:656.0 158:25.0 159:8.0 163:98.0 169:60.0 174:40.0 175:153.0 176:58.0 177:60.0 183:21.0 189:1255.0 190:194.0 191:893.0 19…
dihydroxyacetone	332120	89	22000	RXKJFZQQPQGTFL-UHFFFAOYSA-N	85:347.0 86:296.0 87:242.0 88:356.0 89:3561.0 90:168.0 97:34.0 98:98.0 99:129.0 100:1180.0 101:141.0 102:427.0 103:3726.0 104:261.0 105:358.0 110:95.0 111:8.0 114:1204.0 115:134.0 116:33.0 117:58.0 119:160.0 120:2.0 121:18.0 128:42.0 130:6.0 131:151.0 133:1424.0 134:167.0 135:46.0 136:7.0 139:4.0 142:708.0 143:3.0 147:3616.0 148:459.0 149:251.0 150:1.0 151:34.0 152:3.0 154:4.0 157:51.0 158:20.0 1…
dehydroabietic acid	850374	239	8917	NFWKVWVWBFBAOV-MISYRCLQSA-N	86:3.0 91:5.0 95:52.0 100:123.0 103:154.0 113:7.0 115:48.0 116:270.0 117:458.0 118:31.0 128:458.0 129:250.0 130:43.0 131:210.0 138:6.0 141:353.0 142:165.0 143:325.0 144:453.0 152:58.0 153:66.0 154:107.0 155:66.0 157:196.0 158:79.0 159:89.0 165:156.0 166:55.0 167:86.0 169:91.0 170:38.0 171:308.0 173:234.0 177:29.0 178:30.0 179:24.0 181:24.0 183:94.0 184:22.0 186:29.0 187:73.0 191:34.0 195:36.0 197…
citric acid	617342	273	288	KRKNYBCHXYNGOX-UHFFFAOYSA-N	85:108.0 87:167.0 88:92.0 89:136.0 92:58.0 93:86.0 95:193.0 96:108.0 97:78.0 99:605.0 100:143.0 101:223.0 102:92.0 103:336.0 104:70.0 105:58.0 109:24.0 110:55.0 111:256.0 112:15.0 114:87.0 115:639.0 116:312.0 117:522.0 118:105.0 119:62.0 120:32.0 124:17.0 125:53.0 126:49.0 127:177.0 128:22.0 129:915.0 131:952.0 132:92.0 133:1929.0 134:60.0 135:258.0 136:35.0 137:44.0 139:90.0 140:83.0 141:331.0 1…
citramalic acid	456203	247	16826	XFTRTWQBIOMVPK-UHFFFAOYSA-N	85:1091.0 86:111.0 98:257.0 99:18.0 100:60.0 101:12.0 110:204.0 113:1.0 114:49.0 115:1851.0 116:213.0 117:396.0 130:232.0 131:61.0 132:133.0 133:455.0 134:36.0 142:43.0 143:196.0 145:620.0 147:3368.0 148:292.0 149:356.0 157:133.0 163:393.0 172:749.0 173:94.0 184:92.0 185:314.0 189:130.0 190:22.0 203:434.0 204:37.0 205:70.0 214:79.0 215:43.0 217:200.0 221:78.0 222:7.0 230:23.0 231:379.0 232:100.0 …
cellobiose	932179	204	1373	GUBGYTABKSRVRQ-QUYVBRFLSA-N	85:169.0 86:40.0 87:224.0 89:1164.0 93:16.0 95:81.0 96:78.0 97:144.0 99:39.0 100:142.0 101:420.0 102:239.0 103:2566.0 104:303.0 105:530.0 107:39.0 108:20.0 113:215.0 114:2.0 115:122.0 116:171.0 117:1882.0 119:55.0 123:25.0 125:56.0 127:215.0 129:1861.0 130:230.0 131:535.0 132:80.0 133:993.0 141:125.0 142:21.0 143:419.0 144:69.0 145:87.0 146:72.0 147:5903.0 148:921.0 149:340.0 155:337.0 156:102.0 …
capric acid	452386	229	50422	GHVNFZFCNZKVNT-UHFFFAOYSA-N	86:58.0 95:73.0 100:128.0 115:203.0 116:59.0 117:1692.0 118:22.0 129:683.0 130:12.0 131:212.0 132:438.0 143:65.0 145:173.0 154:11.0 168:16.0 183:18.0 185:23.0 201:16.0 229:495.0 230:98.0 243:21.0 244:16.0 338:5.0 388:4.0 421:13.0 452:4.0 478:6.0 497:4.0
butane-2,3-diol NIST	205778	117	485	OWBTYPJTUOEWEK-UHFFFAOYSA-N	86:129.0 87:1127.0 88:621.0 94:64.0 101:985.0 102:817.0 103:711.0 104:132.0 105:215.0 106:25.0 110:70.0 113:133.0 115:634.0 116:608.0 117:34024.0 118:3483.0 119:1369.0 120:52.0 125:36.0 127:157.0 129:384.0 131:1115.0 132:285.0 133:2648.0 135:67.0 138:16.0 139:52.0 141:34.0 142:52.0 144:30.0 145:56.0 147:9540.0 148:2021.0 149:1454.0 150:98.0 157:44.0 161:36.0 166:51.0 167:48.0 170:14.0 171:19.0 17…
beta-gentiobiose	965352	160	100873	DLRVVLDZNNYCBX-LIZSDCNHSA-N	85:1429.0 86:721.0 87:1340.0 88:666.0 89:9018.0 90:749.0 91:536.0 92:96.0 93:135.0 94:142.0 95:134.0 96:89.0 97:641.0 98:223.0 99:1242.0 100:2366.0 101:8618.0 102:2362.0 103:22500.0 104:1984.0 105:4901.0 106:339.0 107:183.0 109:858.0 110:33.0 111:683.0 112:262.0 113:1304.0 114:964.0 115:1755.0 116:4243.0 117:12702.0 118:1086.0 119:1415.0 120:139.0 121:184.0 125:66.0 126:100.0 127:843.0 128:487.0 …
benzoic acid	339067	179	36	WPYMKLBDIGXBTP-UHFFFAOYSA-N	86:343.0 87:342.0 88:702.0 89:324.0 90:144.0 91:469.0 93:84.0 95:73.0 98:224.0 101:459.0 102:419.0 103:2363.0 105:19922.0 106:1506.0 107:541.0 108:41.0 109:28.0 115:81.0 116:11012.0 117:1187.0 118:403.0 119:326.0 120:194.0 121:192.0 128:258.0 130:1267.0 131:785.0 132:5944.0 133:1178.0 134:622.0 135:12484.0 136:1522.0 137:356.0 139:52.0 144:953.0 146:581.0 149:399.0 158:68.0 159:237.0 160:66.0 161…
azelaic acid	610651	317	16968	BDJRBEYXGGNYIS-UHFFFAOYSA-N	85:2096.0 86:1225.0 87:259.0 88:843.0 89:1168.0 90:288.0 91:1560.0 93:4695.0 95:1119.0 96:642.0 97:6057.0 98:933.0 99:2012.0 101:684.0 102:246.0 105:938.0 106:105.0 107:5683.0 108:250.0 109:2432.0 110:689.0 111:6645.0 112:391.0 114:111.0 115:730.0 116:6544.0 117:17178.0 118:1477.0 119:992.0 123:2641.0 124:3727.0 125:2141.0 126:84.0 128:71.0 129:18035.0 130:2209.0 131:2007.0 132:1359.0 133:2234.0 …
alpha-ketoglutarate	507392	198	294	KPGXRSRHYNQIFN-UHFFFAOYSA-N	85:208.0 87:154.0 89:4657.0 90:84.0 91:201.0 94:49.0 98:155.0 99:133.0 101:112.0 102:113.0 103:234.0 110:90.0 112:1654.0 113:180.0 114:75.0 115:296.0 118:19.0 125:56.0 126:615.0 128:246.0 129:323.0 131:331.0 133:422.0 135:87.0 142:51.0 143:95.0 144:23.0 145:67.0 147:7768.0 148:1161.0 149:693.0 152:14.0 154:243.0 155:35.0 156:3139.0 157:398.0 158:205.0 159:36.0 160:14.0 161:16.0 163:100.0 170:1125…
alanine	243971	116	34178	QNAYBMKLOCPYGJ-REOHCLBHSA-N	85:333.0 86:2106.0 87:467.0 88:280.0 89:5.0 90:53.0 91:138.0 92:168.0 93:215.0 94:1333.0 95:43.0 96:6.0 98:74.0 99:48.0 100:4652.0 101:1063.0 102:1419.0 103:3674.0 104:501.0 105:328.0 106:3.0 108:75.0 109:236.0 110:175.0 112:94.0 114:926.0 115:860.0 116:84295.0 117:10442.0 118:3671.0 119:545.0 120:126.0 121:65.0 122:38.0 123:90.0 124:32.0 125:42.0 126:107.0 127:278.0 128:1618.0 129:278.0 130:1195…
adipic acid	474435	111	125	WNLRTRBMVRJNCN-UHFFFAOYSA-N	85:2037.0 86:2852.0 87:703.0 88:641.0 89:904.0 90:27.0 91:64.0 92:167.0 93:122.0 94:58.0 95:60.0 96:79.0 97:441.0 99:4029.0 100:405.0 101:502.0 102:524.0 105:259.0 107:59.0 108:26.0 109:187.0 110:362.0 111:58622.0 112:3744.0 113:1086.0 114:171.0 115:1351.0 116:2824.0 117:11244.0 118:1055.0 119:703.0 120:50.0 123:10.0 124:19.0 125:208.0 126:57.0 128:229.0 129:9390.0 130:2687.0 131:1989.0 132:910.0…
aconitic acid	586815	229	29	GTZCVFVGUGFEME-IWQZZHSRSA-N	85:823.0 86:194.0 87:662.0 88:337.0 89:711.0 90:119.0 91:200.0 93:1018.0 94:224.0 95:1683.0 96:1733.0 97:6038.0 98:1174.0 99:1242.0 100:178.0 101:600.0 102:310.0 103:1548.0 104:242.0 105:655.0 107:259.0 108:172.0 109:241.0 110:546.0 111:911.0 112:674.0 113:694.0 115:1207.0 116:392.0 117:2280.0 118:273.0 119:1093.0 120:174.0 121:326.0 122:39.0 123:487.0 124:76.0 125:294.0 126:191.0 127:456.0 128:2…
5-hydroxymethyl-2-furoic acid NIST	497561	123	31858	PCSKKIUURRTAEM-UHFFFAOYSA-N	92:69.0 93:77.0 94:32.0 95:395.0 96:128.0 97:124.0 105:40.0 106:152.0 108:67.0 109:92.0 110:177.0 111:447.0 112:39.0 115:82.0 123:2802.0 124:246.0 125:117.0 128:270.0 133:388.0 134:293.0 135:97.0 137:42.0 138:81.0 147:3685.0 148:315.0 149:259.0 150:69.0 152:21.0 153:327.0 154:28.0 168:14.0 169:1041.0 170:117.0 175:38.0 177:35.0 178:35.0 182:37.0 197:598.0 198:39.0 199:34.0 203:33.0 209:19.0 210:2…
4-hydroxybenzoate	537925	223	34016	FJKROLUGYXJWQN-UHFFFAOYSA-M	85:234.0 86:343.0 87:138.0 88:10.0 89:445.0 90:153.0 91:1213.0 92:426.0 94:40.0 95:138.0 97:24.0 99:110.0 100:926.0 102:103.0 103:924.0 104:382.0 105:205.0 107:273.0 108:181.0 109:237.0 110:52.0 111:54.0 112:151.0 113:137.0 114:118.0 115:619.0 116:25.0 117:1204.0 118:246.0 119:2.0 120:165.0 121:272.0 122:78.0 126:804.0 128:1.0 129:116.0 130:67.0 131:85.0 132:195.0 133:25.0 134:349.0 135:418.0 136…
3-hydroxypropionic acid	269265	177	1977	ALRHLSYJTWAHJZ-UHFFFAOYSA-N	85:317.0 87:1774.0 88:555.0 89:599.0 90:145.0 92:72.0 94:12.0 97:21.0 98:250.0 99:13.0 100:2863.0 101:1816.0 102:1129.0 103:1749.0 104:165.0 105:296.0 106:148.0 107:346.0 108:79.0 110:47.0 111:3.0 112:18.0 114:15.0 115:504.0 116:1895.0 117:741.0 118:214.0 124:3.0 125:97.0 127:452.0 128:11.0 129:912.0 130:261.0 131:1035.0 132:105.0 133:1862.0 134:111.0 135:188.0 139:1.0 140:13.0 142:22.0 143:205.0…
3-hydroxy-3-methylglutaric acid	521554	247	32000	NPOAOTPXWNWTSH-UHFFFAOYSA-N	85:626.0 88:16.0 99:275.0 100:730.0 101:73.0 102:61.0 103:177.0 105:4.0 109:1920.0 110:105.0 111:74.0 112:83.0 113:58.0 114:82.0 115:2396.0 116:497.0 117:648.0 119:126.0 122:1.0 128:36.0 129:150.0 131:335.0 133:955.0 134:20.0 135:5.0 140:38.0 141:84.0 142:47.0 144:16.0 147:3623.0 148:545.0 149:525.0 150:59.0 151:23.0 157:174.0 159:95.0 163:168.0 164:7.0 170:7.0 171:247.0 172:45.0 183:513.0 184:30…
3-deoxyhexitol NIST	617140	219	21722		85:1361.0 86:3025.0 87:1899.0 88:1165.0 89:5407.0 90:557.0 91:664.0 92:72.0 93:410.0 94:412.0 95:2502.0 96:628.0 97:1227.0 98:353.0 99:1474.0 100:541.0 101:7924.0 102:1029.0 103:44360.0 104:4372.0 105:2280.0 106:111.0 107:500.0 108:259.0 109:295.0 110:383.0 111:1297.0 112:190.0 113:1242.0 114:289.0 115:5459.0 116:2746.0 117:17341.0 118:1761.0 119:1980.0 120:156.0 121:144.0 122:33.0 123:125.0 124:…
3,6-anhydro-d-hexose	602439	231	16831	SYSZGJKBOHEMPB-FIVCZYLNSA-N	85:1106.0 86:456.0 87:784.0 88:151.0 89:9261.0 90:842.0 91:422.0 93:550.0 94:779.0 95:15560.0 96:1047.0 97:371.0 98:1417.0 99:1263.0 100:1605.0 101:5484.0 102:1031.0 103:14128.0 104:1344.0 105:12134.0 106:1092.0 107:461.0 108:265.0 109:164.0 110:242.0 111:1152.0 112:677.0 113:384.0 114:326.0 115:1025.0 116:1984.0 117:10955.0 118:1193.0 119:1300.0 120:101.0 121:714.0 122:212.0 123:1036.0 124:101.0…
3,6-anhydro-D-glucose	587617	231	16782	WZYRMLAWNVOIEX-SLPGGIOYSA-N	85:2651.0 86:1379.0 87:3019.0 88:1300.0 89:25434.0 90:2285.0 91:1263.0 92:115.0 93:1209.0 94:1132.0 95:14971.0 96:2959.0 97:1423.0 98:4240.0 99:2750.0 100:4219.0 101:13829.0 102:3622.0 103:44711.0 104:3976.0 105:12724.0 106:1217.0 107:496.0 108:481.0 109:489.0 110:986.0 111:2472.0 112:1444.0 113:1770.0 114:861.0 115:3085.0 116:3634.0 117:19400.0 118:2401.0 119:3534.0 120:636.0 121:1755.0 122:419.…
3,4-dihydroxybenzoic acid	620200	193	16806	YQUVCSBJEUQKSH-UHFFFAOYSA-N	89:294.0 91:134.0 93:177.0 95:84.0 99:23.0 101:1.0 105:717.0 106:34.0 107:597.0 108:35.0 109:434.0 110:81.0 114:14.0 116:27.0 119:71.0 121:58.0 122:15.0 123:183.0 127:81.0 130:7.0 133:258.0 134:189.0 135:133.0 136:54.0 137:2319.0 138:203.0 139:29.0 141:73.0 142:124.0 143:107.0 144:53.0 149:8.0 151:103.0 152:33.0 157:315.0 160:202.0 161:42.0 162:19.0 163:433.0 164:141.0 165:2034.0 166:273.0 167:72…
2-isopropylmalic acid	508690	275	17246	BITYXLXUCSKTJS-UHFFFAOYSA-N	85:164.0 86:435.0 91:1392.0 92:56.0 93:44.0 94:188.0 95:690.0 97:445.0 98:159.0 99:1079.0 100:625.0 102:285.0 108:29.0 111:197.0 112:121.0 113:1409.0 115:3750.0 116:999.0 117:1809.0 118:177.0 119:438.0 123:320.0 124:51.0 125:87.0 128:4253.0 129:1939.0 130:566.0 131:725.0 132:283.0 133:2294.0 134:245.0 141:264.0 142:225.0 143:1827.0 144:249.0 145:55.0 147:13353.0 148:2418.0 149:2887.0 150:485.0 15…
2-hydroxyglutaric acid	506306	247	2000	HWXBTNAVRSUOJR-UHFFFAOYSA-N	85:987.0 86:115.0 99:30.0 101:119.0 103:121.0 105:91.0 115:9.0 116:84.0 117:39.0 129:3826.0 130:487.0 131:370.0 132:6.0 133:412.0 134:38.0 146:11.0 147:1685.0 148:252.0 149:537.0 150:24.0 157:1113.0 158:97.0 159:129.0 163:13.0 172:4.0 184:12.0 203:612.0 204:140.0 217:9.0 218:20.0 231:219.0 247:1048.0 248:174.0 249:17.0 349:124.0 350:3.0 354:11.0 477:11.0 479:1.0
2-hydroxyadipic acid	549663	261	17568	OTTXIFWBPRRYOG-UHFFFAOYSA-N	86:245.0 94:5.0 95:55.0 99:936.0 101:838.0 102:139.0 103:327.0 105:54.0 109:1264.0 110:19.0 114:114.0 115:146.0 116:275.0 117:158.0 118:94.0 129:9291.0 130:1262.0 131:1431.0 132:99.0 133:1110.0 134:617.0 138:77.0 139:368.0 142:231.0 143:49.0 144:115.0 147:4676.0 148:456.0 149:1131.0 150:119.0 155:312.0 157:17.0 158:126.0 159:67.0 163:112.0 169:25.0 171:5687.0 172:748.0 173:413.0 174:40.0 175:29.0…
2-deoxyerythritol	354388	117	34100	ARXKVVRQIIOZGF-UHFFFAOYSA-N	85:23.0 87:267.0 88:102.0 90:44.0 92:50.0 94:2.0 95:128.0 96:46.0 97:56.0 98:29.0 99:824.0 101:852.0 102:113.0 103:2298.0 104:36.0 105:287.0 107:3149.0 109:28.0 110:1239.0 111:502.0 112:5.0 113:172.0 114:200.0 115:31.0 116:4912.0 117:13201.0 118:1597.0 119:723.0 120:94.0 126:363.0 127:363.0 128:27.0 129:1313.0 130:120.0 131:815.0 133:1914.0 134:97.0 135:459.0 136:133.0 138:4.0 139:10.0 142:71.0 1…
1-deoxyerythritol	357129	117	17781		85:236.0 86:64.0 87:671.0 88:30.0 89:302.0 90:15.0 100:175.0 101:3971.0 102:319.0 103:7576.0 104:803.0 105:90.0 110:329.0 114:382.0 115:1520.0 116:16358.0 117:42947.0 118:4762.0 119:2153.0 120:13.0 127:335.0 129:3334.0 130:1054.0 131:3525.0 132:400.0 133:5494.0 135:111.0 140:549.0 142:164.0 143:2360.0 144:141.0 145:408.0 147:17853.0 148:3097.0 149:2517.0 150:147.0 151:82.0 153:1.0 156:243.0 158:1…
4797	320536	117	4797		85:182.0 86:267.0 89:5206.0 90:415.0 99:93.0 100:397.0 101:4762.0 102:294.0 103:30.0 106:32.0 107:4.0 109:1.0 116:919.0 117:19382.0 118:1740.0 119:629.0 121:57.0 124:4.0 125:1.0 126:5.0 127:43.0 130:93.0 137:2.0 139:42.0 141:3.0 144:5.0 145:6.0 146:168.0 156:2069.0 157:228.0 158:45.0 159:754.0 160:204.0 168:26.0 171:2.0 178:26.0 184:125.0 189:1.0 193:78.0 194:26.0 197:11.0 211:37.0 213:8.0 216:2.…
41682	605091	144	41682		85:286.0 86:660.0 87:664.0 88:173.0 89:6304.0 90:503.0 91:414.0 93:23.0 94:238.0 96:128.0 98:241.0 99:576.0 100:3879.0 101:1028.0 102:777.0 103:7555.0 104:658.0 105:225.0 106:38.0 107:59.0 108:76.0 109:219.0 110:382.0 111:379.0 112:353.0 113:306.0 114:110.0 115:447.0 116:776.0 117:1908.0 119:478.0 120:217.0 121:90.0 122:130.0 124:63.0 126:401.0 127:310.0 128:1045.0 129:6225.0 130:774.0 131:1936.0…
3781	948550	204	3781		85:356.0 86:409.0 88:341.0 89:959.0 90:10.0 91:31.0 96:405.0 97:374.0 99:81.0 100:623.0 101:580.0 102:248.0 103:4375.0 104:371.0 105:876.0 107:308.0 109:273.0 110:265.0 111:226.0 113:198.0 114:142.0 115:84.0 116:282.0 117:1524.0 118:156.0 119:86.0 120:64.0 125:47.0 126:222.0 127:532.0 128:116.0 129:4207.0 130:718.0 131:878.0 132:61.0 133:1384.0 134:281.0 135:335.0 136:124.0 139:95.0 140:38.0 141:…
3247	979460	160	3247		89:475.0 99:30.0 100:75.0 101:176.0 102:3.0 103:1711.0 104:76.0 105:97.0 107:70.0 113:96.0 114:40.0 116:178.0 117:836.0 128:28.0 129:2250.0 130:245.0 131:294.0 132:3.0 133:486.0 141:10.0 142:63.0 143:227.0 145:40.0 147:2058.0 148:360.0 149:245.0 151:16.0 155:252.0 156:8.0 157:255.0 158:44.0 160:1119.0 161:382.0 162:81.0 163:110.0 165:51.0 169:1309.0 170:95.0 171:105.0 172:16.0 173:14.0 177:77.0 1…
102821	840601	173	102821		85:254.0 86:159.0 87:252.0 88:89.0 89:1637.0 90:85.0 91:110.0 95:34.0 97:83.0 98:64.0 99:157.0 100:216.0 101:581.0 102:99.0 103:3085.0 104:321.0 105:249.0 111:78.0 112:137.0 113:198.0 114:200.0 115:183.0 116:301.0 117:1753.0 118:139.0 119:150.0 121:29.0 126:76.0 127:228.0 128:51.0 129:1243.0 130:192.0 131:478.0 132:132.0 133:1044.0 134:144.0 135:102.0 136:28.0 138:44.0 139:26.0 140:38.0 141:27.0 …
102809	881667	233	102809		85:138.0 86:301.0 87:199.0 88:95.0 89:2604.0 90:296.0 91:96.0 96:112.0 97:86.0 98:120.0 99:276.0 100:627.0 101:3364.0 102:473.0 103:2212.0 104:280.0 105:1167.0 106:69.0 111:89.0 112:67.0 113:158.0 114:399.0 115:308.0 116:743.0 117:2471.0 118:291.0 119:185.0 126:83.0 127:70.0 128:161.0 129:3083.0 130:705.0 131:1084.0 132:192.0 133:2441.0 134:329.0 135:238.0 138:103.0 141:87.0 142:175.0 143:881.0 1…
102808	993307	204	102808		85:354.0 86:159.0 87:300.0 88:107.0 89:2566.0 90:219.0 91:69.0 94:27.0 95:98.0 96:86.0 97:217.0 98:61.0 99:317.0 100:1011.0 101:2135.0 102:674.0 103:10925.0 104:1013.0 105:1192.0 107:56.0 109:262.0 111:279.0 112:54.0 113:431.0 114:162.0 115:365.0 116:1120.0 117:4251.0 118:421.0 119:535.0 125:40.0 126:98.0 127:266.0 128:138.0 129:6215.0 130:891.0 131:1759.0 132:367.0 133:4135.0 134:423.0 135:395.0…
102793	625700	202	102793		85:281.0 86:239.0 88:146.0 89:3072.0 91:124.0 97:39.0 98:156.0 99:209.0 100:863.0 101:1102.0 102:390.0 103:7906.0 104:793.0 105:1442.0 106:43.0 107:83.0 112:10.0 114:373.0 116:115.0 117:1411.0 118:261.0 119:493.0 128:375.0 129:565.0 131:938.0 133:2480.0 134:506.0 140:57.0 142:247.0 143:246.0 144:56.0 145:63.0 147:5420.0 148:368.0 149:717.0 164:54.0 167:21.0 168:39.0 170:126.0 171:199.0 172:506.0 …
102791	809367	217	102791		85:78.0 88:63.0 89:152.0 95:41.0 99:92.0 101:536.0 102:84.0 103:2349.0 104:142.0 105:82.0 106:65.0 113:87.0 114:38.0 115:49.0 116:247.0 117:727.0 118:70.0 121:39.0 123:21.0 125:25.0 126:38.0 129:829.0 130:115.0 131:501.0 132:74.0 133:370.0 134:71.0 139:32.0 140:19.0 142:42.0 143:167.0 147:1944.0 148:277.0 149:275.0 150:67.0 153:21.0 154:41.0 155:163.0 157:421.0 158:76.0 159:98.0 161:86.0 163:41.0…
102790	253973	145	102790		88:393.0 89:405.0 97:82.0 99:47.0 101:405.0 103:369.0 113:44.0 115:254.0 116:45.0 117:858.0 119:133.0 123:74.0 125:37.0 130:132.0 131:416.0 132:130.0 133:1401.0 135:148.0 141:33.0 143:172.0 144:419.0 145:8565.0 146:947.0 147:4052.0 148:779.0 149:544.0 175:41.0 177:258.0 178:63.0 182:20.0 187:18.0 204:32.0 205:210.0 206:53.0 207:77.0 233:27.0 421:20.0 430:20.0 432:16.0 435:16.0
102784	410971	145	102784		85:289.0 88:99.0 90:60.0 93:59.0 94:30.0 97:127.0 99:232.0 100:74.0 101:1889.0 102:158.0 103:463.0 105:72.0 109:35.0 111:40.0 112:86.0 113:322.0 114:62.0 115:4816.0 116:505.0 117:465.0 118:43.0 129:142.0 130:271.0 141:43.0 143:1603.0 144:234.0 145:4512.0 146:427.0 147:527.0 150:30.0 157:362.0 158:59.0 159:279.0 161:36.0 168:19.0 173:19.0 178:21.0 179:24.0 187:521.0 188:48.0 189:53.0 190:22.0 198:…
102776	890171	233	102776		86:40.0 88:18.0 89:1396.0 91:43.0 95:67.0 96:90.0 97:203.0 98:79.0 99:118.0 100:383.0 101:1914.0 102:213.0 103:1458.0 104:199.0 105:455.0 106:54.0 110:33.0 111:50.0 114:177.0 115:241.0 116:481.0 117:1574.0 118:187.0 119:193.0 124:18.0 125:17.0 127:68.0 128:21.0 129:1254.0 130:145.0 131:219.0 132:125.0 133:1410.0 135:74.0 141:53.0 143:146.0 144:23.0 145:139.0 147:4280.0 148:230.0 149:639.0 157:376…
102749	436266	147	102749		85:2569.0 86:298.0 87:1311.0 88:142.0 89:446.0 90:77.0 91:142.0 92:66.0 97:49.0 98:173.0 99:3176.0 100:425.0 101:823.0 102:291.0 103:1334.0 104:184.0 105:311.0 107:58.0 113:90.0 115:669.0 116:241.0 117:1153.0 118:165.0 119:235.0 120:35.0 123:149.0 126:49.0 127:188.0 129:293.0 130:196.0 131:1603.0 132:223.0 133:2068.0 134:392.0 135:221.0 142:67.0 143:1605.0 144:204.0 145:87.0 146:55.0 147:39254.0 …
102747	780713	277	102747		85:61.0 86:38.0 87:511.0 88:81.0 89:2390.0 90:181.0 91:75.0 97:98.0 99:153.0 100:464.0 101:1662.0 102:387.0 103:3092.0 104:122.0 105:484.0 111:99.0 113:77.0 116:677.0 117:16377.0 118:1744.0 119:739.0 120:66.0 128:42.0 129:2150.0 130:428.0 131:555.0 132:204.0 133:1581.0 134:256.0 135:104.0 137:29.0 138:46.0 140:42.0 141:45.0 142:57.0 143:345.0 144:30.0 145:225.0 146:68.0 147:4702.0 148:566.0 149:1…
102746	854773	247	102746		85:579.0 95:63.0 98:19.0 99:195.0 101:1064.0 102:276.0 103:1270.0 104:168.0 105:503.0 113:212.0 115:244.0 116:398.0 117:1103.0 127:196.0 128:98.0 129:2620.0 130:464.0 131:1486.0 133:1140.0 134:231.0 135:93.0 137:39.0 141:58.0 147:3588.0 148:619.0 149:703.0 150:97.0 156:68.0 157:1484.0 158:241.0 159:222.0 160:1579.0 161:598.0 162:82.0 163:334.0 181:34.0 187:142.0 190:100.0 191:1038.0 192:242.0 193…
102741	492406	268	102741		88:184.0 89:98.0 99:203.0 103:148.0 104:128.0 110:232.0 112:338.0 113:78.0 114:210.0 127:240.0 128:43.0 131:93.0 133:222.0 144:19.0 147:2570.0 149:177.0 151:33.0 156:390.0 157:78.0 170:17.0 177:51.0 184:99.0 185:37.0 198:83.0 206:63.0 228:20.0 238:17.0 267:32.0 268:3337.0 269:583.0 270:145.0 285:26.0 295:35.0 370:179.0 371:76.0 372:29.0
102740	423375	138	102740		86:48.0 89:999.0 90:102.0 92:70.0 93:54.0 94:121.0 95:171.0 97:108.0 98:57.0 99:15.0 101:101.0 106:647.0 107:342.0 108:97.0 109:57.0 110:74.0 111:509.0 112:95.0 113:28.0 116:59.0 121:35.0 122:264.0 123:296.0 124:55.0 125:74.0 129:56.0 136:63.0 138:2813.0 139:252.0 141:56.0 151:37.0 152:536.0 153:162.0 154:119.0 155:16.0 156:50.0 167:47.0 168:734.0 169:367.0 170:83.0 172:66.0 180:163.0 181:37.0 18…
102735	860701	173	102735		85:130.0 86:118.0 87:113.0 89:1223.0 90:35.0 92:29.0 99:83.0 100:263.0 101:788.0 102:176.0 103:1585.0 105:38.0 111:12.0 113:68.0 114:231.0 115:129.0 116:102.0 117:783.0 119:62.0 125:23.0 129:1611.0 130:212.0 131:137.0 132:82.0 133:965.0 134:74.0 143:217.0 144:37.0 145:80.0 147:2479.0 148:394.0 149:263.0 151:38.0 158:30.0 159:36.0 160:1281.0 161:172.0 162:58.0 163:38.0 167:17.0 169:11.0 170:35.0 1…
102734	945605	436	102734		85:644.0 86:234.0 87:458.0 88:422.0 89:5286.0 90:455.0 91:242.0 94:107.0 95:156.0 96:179.0 97:245.0 98:97.0 99:612.0 100:1500.0 101:3057.0 102:982.0 103:16936.0 104:1557.0 105:2717.0 106:253.0 107:158.0 108:76.0 110:116.0 111:531.0 112:315.0 113:653.0 114:520.0 115:494.0 116:1475.0 117:13515.0 118:1232.0 119:991.0 120:117.0 124:69.0 125:63.0 126:279.0 127:543.0 128:387.0 129:8084.0 130:1293.0 131…
102733	929900	271	102733		85:135.0 86:75.0 87:175.0 88:150.0 89:1877.0 90:208.0 94:53.0 95:48.0 97:79.0 99:186.0 100:115.0 101:740.0 102:185.0 103:5733.0 104:454.0 105:934.0 106:107.0 107:88.0 109:133.0 110:86.0 111:242.0 112:109.0 113:284.0 114:183.0 115:154.0 116:359.0 117:4611.0 118:449.0 119:290.0 120:31.0 127:129.0 128:181.0 129:2860.0 130:333.0 131:867.0 132:155.0 133:2044.0 134:236.0 135:183.0 139:67.0 140:47.0 141…
102732	800467	175	102732		85:147.0 87:101.0 89:146.0 95:61.0 99:192.0 101:1704.0 102:159.0 103:3451.0 104:313.0 111:103.0 113:34.0 115:302.0 116:507.0 117:1203.0 118:161.0 129:7644.0 130:996.0 131:1199.0 132:130.0 133:1303.0 134:77.0 135:90.0 139:30.0 142:36.0 143:241.0 144:60.0 145:125.0 147:4198.0 148:566.0 149:440.0 157:370.0 159:90.0 161:52.0 163:128.0 169:44.0 170:50.0 171:39.0 173:90.0 175:10597.0 176:1394.0 177:536…
102731	507428	167	102731		85:1162.0 86:257.0 87:741.0 88:240.0 89:5757.0 90:272.0 91:1725.0 92:322.0 93:11383.0 94:764.0 95:4428.0 96:216.0 97:487.0 98:511.0 99:1919.0 100:289.0 101:1028.0 102:426.0 103:1972.0 104:236.0 105:826.0 106:470.0 107:354.0 108:241.0 109:133.0 110:50.0 111:114.0 113:323.0 114:76.0 115:1813.0 116:422.0 117:3581.0 118:444.0 119:992.0 120:87.0 121:157.0 122:58.0 123:139.0 124:30.0 125:327.0 127:701.…
102730	772342	117	102730		85:183.0 86:785.0 87:1394.0 88:575.0 89:5863.0 90:529.0 91:169.0 92:46.0 94:98.0 95:55.0 97:60.0 98:116.0 99:670.0 100:1182.0 101:5807.0 102:1663.0 103:4382.0 104:497.0 105:2605.0 106:256.0 107:54.0 110:27.0 111:103.0 112:253.0 113:376.0 114:1472.0 115:1089.0 116:2172.0 117:57057.0 118:6035.0 119:2599.0 120:199.0 123:28.0 124:47.0 125:110.0 126:244.0 127:252.0 128:493.0 129:8066.0 130:1543.0 131:…
102729	281745	165	102729		87:3445.0 88:697.0 89:5513.0 90:1053.0 91:41775.0 92:3698.0 101:737.0 102:3302.0 103:8282.0 104:1325.0 105:4415.0 106:2170.0 108:159.0 111:81.0 113:390.0 115:5634.0 116:1228.0 117:1871.0 118:400.0 119:1606.0 120:458.0 121:679.0 123:767.0 124:235.0 131:9328.0 132:2916.0 133:5746.0 135:29636.0 136:3996.0 137:1592.0 139:5029.0 140:350.0 141:770.0 145:482.0 148:60255.0 149:49131.0 150:6486.0 151:1570…
102728	974053	271	102728		85:849.0 86:366.0 87:399.0 88:513.0 89:4127.0 90:437.0 91:562.0 92:21.0 94:99.0 96:263.0 97:707.0 98:257.0 99:777.0 100:1676.0 101:2658.0 102:1373.0 103:13253.0 104:1535.0 105:1901.0 106:145.0 107:161.0 109:384.0 111:554.0 112:171.0 113:1001.0 114:457.0 115:505.0 116:1331.0 117:10251.0 118:1068.0 119:1692.0 121:240.0 122:65.0 124:36.0 125:202.0 126:439.0 127:308.0 128:396.0 129:7457.0 130:1838.0 …
102727	852798	173	102727		86:71.0 89:571.0 90:45.0 99:39.0 101:311.0 102:79.0 103:335.0 105:154.0 111:26.0 115:74.0 116:165.0 117:413.0 129:674.0 130:161.0 133:358.0 141:22.0 142:20.0 147:1244.0 149:95.0 152:24.0 158:44.0 160:847.0 163:40.0 168:16.0 169:30.0 171:41.0 173:3055.0 174:449.0 175:158.0 176:45.0 187:39.0 189:278.0 201:23.0 204:141.0 205:104.0 215:199.0 216:78.0 217:684.0 219:77.0 229:35.0 231:76.0 232:47.0 249:…
102716	964735	271	102716		85:203.0 86:198.0 87:266.0 88:75.0 89:1548.0 90:104.0 91:111.0 95:46.0 97:92.0 98:40.0 99:222.0 100:517.0 101:1287.0 102:465.0 103:3250.0 104:260.0 105:641.0 109:113.0 111:419.0 112:45.0 113:260.0 114:264.0 115:253.0 116:484.0 117:3556.0 118:296.0 119:295.0 121:35.0 122:63.0 126:97.0 127:258.0 128:109.0 129:2739.0 130:572.0 131:730.0 132:108.0 133:1782.0 134:265.0 135:95.0 136:24.0 141:123.0 142:…
102715	956981	271	102715		85:192.0 86:217.0 87:161.0 89:2168.0 90:70.0 96:41.0 97:266.0 99:362.0 100:565.0 101:1463.0 102:342.0 103:4068.0 104:343.0 105:1107.0 106:36.0 109:174.0 111:398.0 113:486.0 114:204.0 115:329.0 116:948.0 117:4894.0 118:404.0 119:15.0 120:102.0 125:45.0 127:353.0 128:187.0 129:4021.0 130:653.0 131:1480.0 132:266.0 133:2533.0 134:259.0 135:212.0 139:101.0 141:182.0 142:244.0 143:974.0 144:211.0 145:…
102714	588886	231	102714		85:192.0 86:135.0 87:64.0 88:217.0 89:4369.0 90:296.0 91:328.0 92:63.0 93:171.0 94:173.0 95:2021.0 96:291.0 97:94.0 98:608.0 99:333.0 100:613.0 101:2506.0 102:326.0 103:4816.0 104:494.0 105:1735.0 106:197.0 107:96.0 108:60.0 109:30.0 110:66.0 111:435.0 112:245.0 113:287.0 114:68.0 115:458.0 116:580.0 117:2812.0 118:407.0 119:583.0 121:215.0 122:64.0 123:123.0 124:59.0 125:104.0 126:952.0 127:256.…
102711	619585	231	102711		85:192.0 87:61.0 88:81.0 89:421.0 90:45.0 95:86.0 97:67.0 99:73.0 101:473.0 103:1380.0 104:128.0 112:57.0 113:104.0 114:22.0 115:121.0 116:173.0 117:1316.0 118:99.0 119:103.0 123:14.0 126:63.0 127:182.0 129:1869.0 130:270.0 131:324.0 132:55.0 133:883.0 134:116.0 135:54.0 140:29.0 141:48.0 143:347.0 144:49.0 145:58.0 147:3637.0 148:627.0 149:406.0 151:108.0 155:96.0 159:75.0 163:190.0 164:21.0 166…
102679	865741	173	102679		85:350.0 86:570.0 87:460.0 89:1159.0 90:161.0 91:136.0 94:77.0 95:33.0 96:109.0 97:238.0 98:176.0 99:269.0 100:96.0 101:2864.0 102:528.0 103:8159.0 104:626.0 105:439.0 110:41.0 111:110.0 113:303.0 115:510.0 116:1862.0 117:5952.0 118:578.0 119:485.0 120:37.0 121:37.0 123:17.0 125:99.0 128:139.0 129:6972.0 130:992.0 131:1617.0 132:474.0 133:3442.0 134:448.0 135:245.0 138:22.0 139:50.0 140:14.0 141:…
102662	222719	154	102662		85:644.0 87:57.0 93:170.0 95:22.0 103:113.0 104:43.0 107:154.0 108:89.0 110:976.0 113:36.0 115:50.0 126:111.0 128:61.0 130:295.0 134:217.0 135:41.0 147:387.0 154:3003.0 155:49.0 160:33.0 230:17.0 242:23.0 246:26.0 272:15.0 282:17.0 288:17.0 315:16.0 375:19.0 402:29.0 422:26.0 424:27.0
102661	443306	205	102661		85:252.0 86:309.0 87:286.0 88:262.0 89:3396.0 90:347.0 98:95.0 99:207.0 100:1047.0 101:1152.0 102:512.0 103:2966.0 104:321.0 105:570.0 111:37.0 112:126.0 113:92.0 114:259.0 115:522.0 116:243.0 117:8801.0 118:811.0 119:677.0 120:43.0 121:19.0 125:24.0 126:85.0 127:101.0 128:90.0 129:712.0 130:1223.0 131:821.0 132:198.0 133:2835.0 134:401.0 135:233.0 140:40.0 141:30.0 142:111.0 143:111.0 144:41.0 1…
102616	280925	171	102616		85:708.0 86:3265.0 87:418.0 88:815.0 90:219.0 94:35.0 95:167.0 97:274.0 98:60.0 99:279.0 101:393.0 102:77.0 103:1767.0 104:272.0 105:289.0 109:35.0 110:118.0 111:151.0 112:53.0 113:717.0 114:98.0 115:257.0 116:105.0 118:91.0 125:270.0 128:65.0 129:595.0 130:294.0 131:153.0 134:336.0 140:401.0 141:291.0 142:75.0 143:128.0 144:17.0 146:151.0 155:110.0 156:233.0 157:53.0 161:23.0 167:121.0 170:162.0…
102223	674414	175	102223		85:2654.0 86:4034.0 87:3230.0 88:1522.0 89:29078.0 90:2171.0 91:1608.0 93:134.0 94:231.0 95:85.0 96:428.0 97:1313.0 98:969.0 99:3107.0 100:6788.0 101:14224.0 102:5272.0 103:14959.0 104:1815.0 105:14129.0 106:1459.0 107:666.0 108:208.0 109:52.0 110:265.0 111:1463.0 112:1463.0 113:2037.0 114:7586.0 115:5639.0 116:7542.0 117:68378.0 118:7333.0 119:5045.0 120:446.0 121:229.0 123:142.0 124:380.0 125:2…
101299	214650	177	101299		85:26845.0 86:4607.0 87:40125.0 89:13781.0 90:947.0 91:831.0 95:3946.0 97:851.0 98:205.0 99:16343.0 100:1874.0 101:56172.0 102:17813.0 103:63170.0 104:6724.0 105:10666.0 106:1563.0 107:2258.0 111:260.0 112:134.0 113:4059.0 114:687.0 115:249099.0 116:29624.0 120:1444.0 121:546.0 122:156.0 124:144.0 126:273.0 130:177310.0 131:52953.0 132:12708.0 133:51709.0 134:12306.0 136:563.0 140:45.0 141:32.0 1…
100908	909116	259	100908		88:225.0 89:947.0 96:40.0 97:466.0 100:316.0 101:1663.0 102:197.0 103:7805.0 104:356.0 105:253.0 108:39.0 111:75.0 113:129.0 115:272.0 116:56.0 117:2180.0 119:260.0 127:260.0 128:101.0 129:1533.0 131:475.0 132:83.0 133:1837.0 143:216.0 145:86.0 147:6305.0 148:541.0 149:459.0 157:494.0 158:43.0 159:86.0 161:33.0 163:44.0 169:390.0 189:533.0 190:80.0 204:1318.0 205:1010.0 206:99.0 207:195.0 214:20.…
100880	632888	173	100880		85:188.0 86:168.0 87:206.0 89:358.0 92:24.0 94:58.0 95:53.0 97:62.0 98:21.0 99:95.0 101:2206.0 102:138.0 103:2933.0 104:214.0 105:82.0 106:43.0 109:49.0 111:49.0 112:45.0 113:298.0 115:490.0 116:700.0 117:1536.0 118:190.0 119:111.0 122:28.0 125:67.0 129:3581.0 130:165.0 131:1327.0 132:276.0 133:865.0 134:120.0 135:30.0 136:36.0 143:376.0 145:40.0 147:5252.0 148:1031.0 149:710.0 150:75.0 151:60.0 …
100869	399770	159	100869		85:41265.0 86:2619.0 87:4188.0 88:682.0 89:732.0 90:59.0 91:210.0 93:214.0 95:373.0 96:96.0 97:1075.0 98:264.0 99:5087.0 100:681.0 101:18181.0 102:1154.0 103:2522.0 104:254.0 111:64.0 113:559.0 114:44.0 115:39072.0 116:21531.0 118:275.0 120:24.0 121:31.0 124:26.0 125:236.0 130:18414.0 131:25945.0 132:2058.0 133:486.0 141:363.0 143:92.0 144:102.0 146:101.0 151:18.0 157:84.0 158:1488.0 159:36723.0 …
100768	350637	188	100768		86:2466.0 87:329.0 88:149.0 94:21.0 95:301.0 96:503.0 100:797.0 101:1256.0 102:47.0 103:255.0 104:70.0 111:226.0 113:168.0 114:499.0 115:397.0 116:261.0 117:140.0 123:26.0 125:98.0 127:74.0 128:77.0 129:160.0 130:401.0 131:244.0 133:327.0 134:105.0 135:134.0 137:77.0 139:23.0 142:32.0 143:97.0 144:759.0 145:71.0 146:52.0 147:4115.0 148:374.0 149:257.0 151:64.0 153:416.0 154:18.0 155:425.0 156:9.0…
97332	897169	204	97332		86:125.0 87:56.0 88:100.0 89:760.0 90:60.0 92:92.0 93:144.0 95:156.0 97:42.0 99:50.0 100:56.0 101:566.0 103:1919.0 105:75.0 107:109.0 108:56.0 110:37.0 111:76.0 114:781.0 115:345.0 116:488.0 117:1046.0 118:112.0 119:413.0 120:97.0 122:29.0 127:94.0 128:65.0 129:1626.0 130:235.0 131:537.0 133:922.0 135:113.0 136:32.0 138:35.0 141:73.0 142:66.0 143:316.0 144:89.0 145:3092.0 146:422.0 147:3664.0 148…
97326	866272	171	97326		85:80.0 86:290.0 87:228.0 88:745.0 89:382.0 90:98.0 91:29.0 95:47.0 96:137.0 97:178.0 98:738.0 99:2434.0 100:138.0 101:139.0 108:69.0 109:55.0 112:28.0 113:940.0 114:1014.0 115:374.0 116:91.0 119:47.0 120:24.0 123:8.0 125:56.0 126:340.0 127:3186.0 128:159.0 130:42.0 131:61.0 133:47.0 135:76.0 137:25.0 139:41.0 141:197.0 142:58.0 143:60.0 145:72.0 146:31.0 147:153.0 149:22.0 151:23.0 152:47.0 153:…
89221	403834	117	89221		85:335.0 87:407.0 101:992.0 102:247.0 103:414.0 113:228.0 115:865.0 116:2811.0 117:11308.0 118:1144.0 119:719.0 128:58.0 129:514.0 130:142.0 131:802.0 133:2635.0 134:351.0 135:308.0 143:2019.0 144:444.0 145:525.0 147:6916.0 149:2206.0 150:73.0 175:99.0 176:47.0 185:26.0 193:73.0 202:55.0 203:276.0 204:94.0 212:41.0 213:8.0 217:268.0 218:181.0 219:110.0 220:48.0 221:340.0 222:19.0 223:62.0 233:510…
88911	895846	173	88911		85:269.0 87:455.0 89:731.0 90:63.0 99:55.0 100:181.0 101:424.0 103:3542.0 104:162.0 113:103.0 114:89.0 115:13.0 117:414.0 129:746.0 131:52.0 132:5.0 133:559.0 142:420.0 143:507.0 147:1125.0 149:148.0 155:39.0 157:51.0 158:22.0 163:62.0 165:91.0 171:31.0 172:99.0 173:2024.0 174:235.0 175:76.0 177:59.0 184:56.0 189:581.0 190:120.0 191:291.0 193:235.0 197:7.0 198:45.0 201:15.0 203:31.0 204:124.0 205…
87877	330723	110	87877		88:1346.0 91:1172.0 92:110.0 94:114.0 96:361.0 97:328.0 101:3432.0 105:482.0 106:56.0 107:368.0 108:258.0 110:12556.0 111:1027.0 112:449.0 115:1599.0 116:8192.0 118:316.0 119:294.0 120:319.0 121:239.0 122:57.0 123:89.0 125:191.0 127:497.0 129:9747.0 130:3571.0 131:2130.0 133:2400.0 134:4597.0 135:513.0 136:2722.0 137:268.0 140:37.0 142:440.0 143:952.0 144:3835.0 145:322.0 149:1942.0 151:303.0 152…
54643	591742	197	54643		85:12536.0 86:1539.0 87:1947.0 92:680.0 93:360.0 94:58.0 95:1072.0 96:456.0 97:1594.0 98:2226.0 99:5396.0 100:868.0 104:549.0 108:135.0 109:190.0 110:624.0 111:2152.0 112:1134.0 113:1806.0 114:175.0 115:2273.0 116:2033.0 122:132.0 123:120.0 124:30.0 126:933.0 127:3835.0 128:2286.0 129:980.0 137:284.0 139:1004.0 140:386.0 141:3046.0 142:620.0 143:184.0 144:179.0 149:110.0 150:257.0 151:983.0 152:2…
53724	594337	197	53724		85:8541.0 86:1238.0 87:808.0 88:507.0 89:879.0 90:648.0 93:548.0 94:233.0 96:629.0 97:718.0 98:998.0 99:2871.0 100:560.0 102:137.0 106:192.0 107:62.0 108:92.0 109:683.0 110:1339.0 111:1505.0 112:902.0 114:152.0 115:3180.0 122:27.0 123:198.0 125:1630.0 126:835.0 127:2052.0 128:1228.0 139:1520.0 141:3382.0 142:167.0 144:159.0 150:349.0 151:1219.0 152:3872.0 153:6909.0 154:1794.0 155:9422.0 156:1308…
49382	247010	187	49382		87:1150.0 88:3971.0 89:6838.0 90:728.0 91:2585.0 92:325.0 97:217.0 98:774.0 99:991.0 101:2239.0 103:43678.0 104:4151.0 105:4720.0 106:460.0 107:215.0 109:41.0 110:60.0 111:2305.0 112:2267.0 113:190.0 115:1892.0 121:11.0 129:1278.0 130:152.0 132:334.0 135:127.0 137:61.0 139:27.0 141:38.0 142:1.0 143:1057.0 144:560.0 145:410.0 146:293.0 149:1630.0 153:28.0 157:184.0 158:127.0 159:22.0 160:133.0 161…
48522	286879	187	48522		85:801.0 86:245.0 95:43.0 113:36.0 117:614.0 127:110.0 129:109.0 131:197.0 144:107.0 158:14.0 187:472.0 188:123.0 202:16.0 216:6.0
47170	763143	99	47170		85:95924.0 86:6776.0 87:202.0 90:25.0 92:62.0 95:596.0 96:567.0 97:3843.0 98:2622.0 99:43130.0 100:3117.0 101:158.0 107:75.0 108:32.0 109:743.0 110:2663.0 111:8705.0 112:7237.0 113:24208.0 114:2597.0 123:57.0 124:874.0 125:5604.0 126:4432.0 127:17149.0 128:1682.0 129:185.0 136:17.0 139:690.0 140:470.0 141:8389.0 142:1105.0 153:893.0 154:1635.0 155:8864.0 156:997.0 157:19.0 164:15.0 167:243.0 168:…
42205	590106	197	42205		85:2480.0 86:187.0 88:124.0 89:128.0 91:141.0 92:46.0 97:462.0 99:563.0 100:209.0 107:39.0 108:4.0 110:129.0 111:93.0 113:221.0 115:157.0 118:84.0 119:1.0 126:287.0 128:464.0 129:148.0 131:98.0 136:48.0 139:157.0 140:22.0 141:853.0 142:279.0 143:287.0 146:176.0 151:228.0 152:903.0 153:1046.0 154:252.0 155:1679.0 156:311.0 157:30.0 165:643.0 166:277.0 167:592.0 168:171.0 169:612.0 170:61.0 178:68.…
41938	272954	157	41938		85:290.0 89:587.0 90:186.0 91:323.0 99:2690.0 100:4927.0 104:21.0 106:231.0 107:1667.0 108:310.0 110:1074.0 111:235.0 113:80.0 114:11.0 118:472.0 119:290.0 120:161.0 127:399.0 129:129.0 130:1970.0 131:342.0 132:78.0 134:2706.0 136:47.0 139:183.0 140:21.0 141:972.0 143:329.0 144:1.0 146:328.0 147:69.0 152:1.0 157:2761.0 158:239.0 159:273.0 160:53.0 174:79.0 184:1523.0 185:1518.0 186:140.0 187:32.0…
41811	568579	197	41811		88:29.0 89:67.0 90:116.0 91:86.0 102:25.0 106:31.0 107:89.0 110:204.0 115:330.0 128:413.0 129:160.0 130:163.0 134:72.0 136:97.0 139:78.0 141:926.0 142:76.0 143:46.0 146:39.0 151:110.0 152:631.0 153:1022.0 154:368.0 155:1859.0 156:149.0 164:25.0 165:434.0 166:143.0 167:166.0 169:466.0 170:30.0 178:78.0 179:50.0 180:32.0 181:53.0 183:72.0 184:431.0 185:6.0 197:2385.0 198:383.0 212:1112.0 213:148.0 …
41808	572340	197	41808		85:312.0 88:364.0 90:94.0 91:482.0 98:192.0 99:239.0 100:529.0 102:14.0 104:149.0 110:38.0 113:108.0 114:43.0 115:450.0 116:42.0 127:142.0 128:1050.0 129:445.0 130:417.0 131:64.0 132:47.0 134:568.0 136:27.0 139:63.0 141:1006.0 142:127.0 144:33.0 150:29.0 151:190.0 152:1109.0 153:1523.0 154:470.0 155:3178.0 156:459.0 163:66.0 164:68.0 165:780.0 166:281.0 167:341.0 168:86.0 169:338.0 170:100.0 171:…
41689	621573	160	41689		85:240.0 86:295.0 87:106.0 89:752.0 90:148.0 92:40.0 97:102.0 98:172.0 100:699.0 101:127.0 105:830.0 108:74.0 113:105.0 114:84.0 115:209.0 118:59.0 126:137.0 131:391.0 134:228.0 140:255.0 142:482.0 145:55.0 147:435.0 148:139.0 150:48.0 155:160.0 160:5305.0 161:680.0 162:238.0 163:84.0 164:27.0 171:141.0 173:93.0 174:51.0 188:12.0 204:74.0 215:49.0 216:136.0 231:131.0 243:49.0 246:58.0 247:26.0 25…
31359	457416	85	31359		85:11849.0 86:655.0 88:52.0 89:28.0 93:38.0 96:103.0 97:434.0 98:390.0 99:2360.0 100:142.0 102:35.0 106:25.0 107:26.0 111:111.0 112:136.0 113:1106.0 114:97.0 119:28.0 120:27.0 122:15.0 123:25.0 124:126.0 125:346.0 127:778.0 128:67.0 129:145.0 138:32.0 139:73.0 140:166.0 141:429.0 142:7.0 143:17.0 144:49.0 149:42.0 154:22.0 155:88.0 164:16.0 166:14.0 168:94.0 169:377.0 175:54.0 182:86.0 183:210.0 …
30962	600399	129	30962		86:543.0 87:409.0 88:82.0 89:1943.0 94:89.0 96:50.0 97:198.0 98:94.0 100:540.0 101:2864.0 102:269.0 103:3101.0 104:325.0 105:383.0 108:110.0 111:280.0 112:288.0 114:477.0 115:457.0 116:694.0 117:1517.0 118:211.0 119:260.0 121:62.0 124:179.0 125:45.0 126:124.0 127:373.0 128:283.0 129:5324.0 130:1061.0 131:3386.0 132:303.0 133:3084.0 134:289.0 135:372.0 137:28.0 138:175.0 139:58.0 140:115.0 141:104…
25801	438455	103	25801		85:388.0 86:1132.0 87:530.0 88:733.0 89:1128.0 90:113.0 91:183.0 93:23.0 94:52.0 96:1.0 98:392.0 99:415.0 100:270.0 101:756.0 102:185.0 103:23710.0 104:2179.0 105:1009.0 106:25.0 107:7.0 111:21.0 112:83.0 113:599.0 114:1077.0 115:617.0 116:364.0 117:1302.0 118:295.0 119:453.0 120:72.0 127:85.0 128:1092.0 129:4255.0 130:1122.0 131:1010.0 132:199.0 133:2485.0 134:383.0 135:225.0 140:62.0 141:36.0 1…
22967	788489	319	22967		85:203.0 87:249.0 88:41.0 89:70.0 90:85.0 94:16.0 97:159.0 98:94.0 99:167.0 100:26.0 101:200.0 103:4516.0 104:488.0 105:160.0 108:4.0 110:46.0 111:4.0 113:20.0 115:33.0 118:10.0 119:27.0 126:88.0 127:86.0 128:36.0 129:1109.0 131:359.0 133:838.0 134:206.0 135:328.0 138:12.0 141:92.0 142:50.0 143:147.0 147:240.0 148:907.0 149:445.0 150:26.0 151:11.0 154:11.0 155:154.0 156:78.0 157:1043.0 158:162.0 …
21704	983235	204	21704		85:864.0 86:397.0 87:997.0 88:670.0 89:3371.0 90:306.0 91:249.0 92:49.0 93:61.0 94:66.0 95:236.0 96:87.0 97:772.0 98:134.0 99:884.0 100:199.0 101:6971.0 102:1086.0 103:31089.0 104:3200.0 105:1398.0 106:123.0 107:100.0 109:569.0 110:98.0 111:683.0 112:139.0 113:1344.0 114:320.0 115:1483.0 116:3547.0 117:17484.0 118:1832.0 119:1238.0 120:71.0 121:57.0 123:65.0 125:200.0 126:72.0 127:672.0 128:130.0…
20282	601991	217	20282		102:29.0 103:287.0 104:48.0 110:30.0 117:137.0 118:44.0 119:32.0 121:30.0 123:25.0 127:114.0 129:260.0 135:38.0 137:19.0 143:64.0 152:16.0 184:56.0 189:67.0 190:17.0 198:13.0 215:43.0 217:1472.0 218:316.0 219:169.0 228:26.0 256:17.0 259:16.0 291:17.0 314:21.0 359:21.0 389:15.0 409:16.0 417:19.0 439:13.0 440:13.0 488:13.0 489:20.0 491:12.0 500:19.0
18241	783164	319	18241		85:5668.0 86:1904.0 87:9707.0 88:7157.0 89:34791.0 90:3457.0 91:1718.0 92:299.0 93:315.0 94:492.0 95:1175.0 96:380.0 97:28084.0 98:2216.0 99:4987.0 100:727.0 101:25745.0 102:5444.0 103:332730.0 104:30844.0 105:14528.0 106:1002.0 107:500.0 108:271.0 109:820.0 110:204.0 111:3101.0 112:678.0 113:6376.0 114:1169.0 115:6588.0 116:7758.0 117:136975.0 118:14436.0 119:10736.0 120:1084.0 121:608.0 122:136…
18226	456864	145	18226		85:828.0 86:52.0 87:38.0 88:35.0 89:169.0 97:26.0 98:20.0 99:165.0 100:143.0 101:188.0 102:1627.0 104:29.0 107:249.0 113:75.0 114:78.0 115:946.0 116:88.0 117:756.0 118:49.0 119:54.0 120:15.0 129:537.0 130:1223.0 131:555.0 132:114.0 133:1320.0 135:156.0 143:318.0 144:72.0 145:11226.0 146:1408.0 147:5986.0 148:743.0 149:861.0 150:52.0 151:35.0 157:570.0 158:89.0 159:131.0 160:1.0 161:41.0 162:84.0 …
18173	415283	131	18173		102:1431.0 103:53.0 107:48.0 115:626.0 116:29.0 117:31.0 129:13.0 130:734.0 131:9686.0 132:1130.0 133:1174.0 134:135.0 135:26.0 143:437.0 144:92.0 145:48.0 147:1959.0 148:196.0 149:274.0 150:8.0 191:47.0 207:8.0 217:47.0 220:23.0 221:253.0 222:16.0 277:51.0 292:844.0 293:208.0 294:49.0 305:30.0
18082	252134	85	18082		85:47888.0 86:3191.0 91:915.0 93:343.0 94:44.0 95:2020.0 96:252.0 97:1215.0 107:218.0 108:137.0 109:554.0 123:9.0 125:189.0 128:9.0 130:96.0 134:475.0 136:39.0 168:506.0 184:37.0 199:30.0 224:4.0 238:8.0 249:7.0 287:1.0 301:10.0 321:7.0 335:2.0 349:18.0 378:1.0 390:1.0 402:5.0 444:10.0 447:5.0 474:2.0
17830	802398	204	17830		86:26.0 88:120.0 95:75.0 99:2.0 103:1945.0 108:94.0 109:48.0 110:168.0 117:2196.0 123:16.0 129:880.0 143:303.0 145:177.0 147:1120.0 157:90.0 158:2.0 169:101.0 172:20.0 173:15.0 177:41.0 179:75.0 181:1.0 186:13.0 189:258.0 191:359.0 193:46.0 194:44.0 195:16.0 196:9.0 203:100.0 204:6500.0 205:1217.0 206:495.0 207:355.0 209:97.0 217:1010.0 218:358.0 219:88.0 220:24.0 221:464.0 222:83.0 223:95.0 224:…
17651	535097	275	17651		85:176.0 86:1.0 87:422.0 88:31.0 94:38.0 96:264.0 98:19.0 99:27.0 100:40.0 102:802.0 103:342.0 106:7.0 107:3.0 109:173.0 110:175.0 111:13.0 114:2.0 115:99.0 119:322.0 123:97.0 124:37.0 126:1.0 127:172.0 129:797.0 130:342.0 133:480.0 134:191.0 144:9.0 145:27.0 152:1.0 157:32.0 159:29.0 161:82.0 162:33.0 163:62.0 171:1.0 175:124.0 176:27.0 177:181.0 178:14.0 179:153.0 182:4.0 183:26.0 184:27.0 189:…
17471	843475	204	17471		85:110.0 89:6.0 95:82.0 100:51.0 103:895.0 110:42.0 111:39.0 116:44.0 117:231.0 118:11.0 129:699.0 131:82.0 133:61.0 143:183.0 145:47.0 147:936.0 153:53.0 155:34.0 159:707.0 160:71.0 163:27.0 169:218.0 170:51.0 171:218.0 177:36.0 189:249.0 191:385.0 192:54.0 193:172.0 195:11.0 202:7.0 203:79.0 204:4862.0 205:912.0 206:316.0 207:252.0 209:18.0 212:6.0 217:841.0 218:133.0 219:85.0 221:12.0 222:31.0…
17425	933003	204	17425		85:85.0 86:263.0 87:38.0 89:602.0 91:4.0 93:247.0 94:88.0 95:127.0 98:14.0 99:271.0 100:21.0 101:1863.0 102:255.0 103:8880.0 104:729.0 105:307.0 109:124.0 111:409.0 113:766.0 114:72.0 115:143.0 116:1020.0 117:2736.0 118:249.0 119:407.0 120:36.0 121:181.0 123:25.0 124:13.0 125:99.0 126:76.0 127:137.0 128:89.0 129:10627.0 130:1278.0 131:1740.0 132:333.0 133:3793.0 134:521.0 135:893.0 136:19.0 137:7…
17140	793981	204	17140		86:48.0 91:224.0 95:195.0 97:734.0 98:21.0 100:160.0 103:363.0 107:78.0 108:115.0 113:73.0 116:43.0 117:668.0 119:500.0 124:6.0 129:1445.0 131:233.0 132:71.0 143:639.0 145:212.0 146:178.0 147:1390.0 149:54.0 153:154.0 155:55.0 159:135.0 162:10.0 165:119.0 169:217.0 170:280.0 171:291.0 173:82.0 174:124.0 175:220.0 178:37.0 179:41.0 181:79.0 182:3.0 188:32.0 189:354.0 191:445.0 192:183.0 195:4.0 19…
17069	991778	361	17069		85:562.0 87:449.0 89:935.0 90:54.0 91:303.0 92:6.0 95:452.0 99:433.0 101:583.0 102:749.0 103:11864.0 104:1012.0 106:99.0 107:99.0 109:588.0 111:164.0 113:885.0 114:82.0 115:984.0 116:1159.0 117:1802.0 118:26.0 119:67.0 120:22.0 121:63.0 122:114.0 125:343.0 129:7807.0 130:1181.0 131:2107.0 133:2490.0 134:105.0 135:786.0 136:25.0 137:282.0 139:341.0 140:91.0 141:250.0 142:416.0 143:1633.0 144:273.0…
17068	265535	267	17068		88:160.0 90:21.0 91:50.0 93:208.0 94:26.0 96:136.0 97:614.0 98:540.0 99:75.0 100:107.0 103:81.0 104:65.0 105:43.0 106:34.0 107:295.0 108:87.0 109:40.0 112:30.0 114:30.0 116:484.0 117:40.0 118:113.0 119:48.0 121:2.0 123:25.0 124:31.0 125:95.0 126:104.0 130:309.0 131:506.0 134:807.0 135:20.0 136:6.0 138:14.0 139:14.0 140:18.0 141:4.0 142:21.0 144:44.0 145:133.0 146:538.0 147:1296.0 148:333.0 150:4.…
16855	879867	233	16855		85:35.0 86:187.0 89:611.0 90:96.0 93:240.0 94:69.0 95:102.0 97:93.0 99:280.0 100:251.0 101:1048.0 102:345.0 103:1300.0 105:510.0 109:10.0 111:75.0 112:37.0 113:164.0 114:193.0 115:242.0 116:466.0 117:858.0 118:83.0 119:359.0 120:7.0 121:214.0 122:82.0 124:11.0 127:124.0 128:134.0 129:2296.0 130:397.0 131:906.0 133:1373.0 135:388.0 136:140.0 137:43.0 138:27.0 139:11.0 141:99.0 142:91.0 143:624.0 1…
16850	477598	97	16850		85:5960.0 86:1368.0 87:38433.0 88:6039.0 89:9133.0 90:1262.0 91:502.0 92:39.0 94:1343.0 95:54.0 96:1036.0 97:168952.0 98:9152.0 99:12552.0 100:599.0 101:66715.0 102:31963.0 103:124410.0 104:12463.0 105:5803.0 106:233.0 107:301.0 108:227.0 110:156.0 111:3549.0 112:344.0 113:5517.0 114:1066.0 115:7096.0 116:25598.0 117:15217.0 118:2284.0 119:3300.0 120:125.0 121:154.0 122:35.0 123:1573.0 124:89.0 1…
16817	758926	174	16817		85:212.0 86:4250.0 89:291.0 91:289.0 92:6.0 93:99.0 95:6.0 100:3031.0 101:620.0 102:575.0 103:6463.0 104:482.0 105:780.0 106:3.0 107:154.0 113:207.0 114:64.0 115:1.0 116:3.0 117:175.0 121:68.0 123:1.0 129:696.0 130:35.0 131:142.0 133:512.0 134:4.0 141:184.0 142:139.0 143:226.0 144:172.0 147:4669.0 148:149.0 152:27.0 153:57.0 154:10.0 156:326.0 157:213.0 158:46.0 161:135.0 165:56.0 166:4.0 168:68.…
16561	245883	155	16561		88:9344.0 89:1820.0 90:325.0 91:1578.0 93:1.0 94:37.0 95:378.0 96:782.0 98:255.0 99:135.0 100:399.0 103:4405.0 104:228.0 105:5275.0 106:1100.0 107:327.0 110:4371.0 111:630.0 114:61.0 115:1240.0 117:1418.0 118:418.0 119:1281.0 120:75.0 121:463.0 124:62.0 127:343.0 130:2047.0 131:1273.0 132:189.0 133:4193.0 134:2628.0 135:786.0 137:520.0 138:431.0 141:220.0 142:72.0 143:86.0 145:193.0 146:189.0 148…
14694	796202	204	14694		85:31.0 86:21.0 87:55.0 89:125.0 90:3.0 91:6.0 94:3.0 95:6.0 99:29.0 101:227.0 102:46.0 103:1397.0 104:104.0 105:19.0 108:4.0 109:7.0 110:17.0 111:17.0 112:1.0 113:38.0 114:3.0 115:92.0 116:68.0 117:1733.0 118:140.0 119:130.0 120:5.0 121:1.0 122:5.0 123:6.0 128:6.0 129:495.0 130:67.0 131:141.0 132:20.0 133:273.0 134:38.0 135:30.0 136:6.0 137:3.0 138:1.0 139:5.0 140:5.0 141:2.0 142:6.0 143:264.0 1…
9320	705438	91	9320		89:492.0 90:280.0 91:6528.0 92:625.0 93:280.0 94:34.0 98:1.0 100:89.0 101:56.0 102:76.0 103:787.0 104:108.0 105:959.0 106:177.0 107:2255.0 108:939.0 109:116.0 110:19.0 111:52.0 112:10.0 113:2.0 114:27.0 115:268.0 116:19.0 117:539.0 118:51.0 119:2585.0 120:263.0 121:325.0 122:15.0 126:36.0 127:179.0 128:19.0 129:48.0 132:4.0 133:458.0 134:3157.0 135:2262.0 136:217.0 140:15.0 143:150.0 144:27.0 147…
6646	584590	205	6646		85:237.0 86:18.0 89:620.0 90:132.0 92:138.0 93:371.0 94:23.0 95:86.0 97:26.0 99:10.0 100:277.0 101:143.0 102:54.0 103:454.0 104:12.0 105:26.0 106:26.0 107:127.0 110:127.0 111:57.0 112:23.0 113:38.0 114:215.0 115:494.0 116:29.0 117:2092.0 118:131.0 119:26.0 120:197.0 125:6.0 126:171.0 127:211.0 129:376.0 130:329.0 131:198.0 132:29.0 133:499.0 134:185.0 136:9.0 139:24.0 140:21.0 142:87.0 143:115.0 …
6330	369952	191	6330		85:539.0 86:180.0 87:239.0 88:125.0 89:32.0 91:63.0 92:44.0 95:42.0 97:130.0 98:351.0 100:503.0 101:230.0 102:320.0 103:769.0 104:67.0 105:96.0 106:12.0 107:24.0 108:14.0 109:22.0 110:229.0 111:426.0 112:28.0 113:9.0 114:309.0 115:204.0 116:292.0 117:335.0 118:48.0 119:84.0 122:10.0 123:2.0 124:16.0 125:86.0 126:82.0 127:5.0 128:338.0 129:52.0 130:295.0 131:398.0 132:38.0 133:353.0 134:194.0 135:…
6104	241903	244	6104		86:145.0 88:174.0 89:301.0 90:119.0 93:25.0 97:188.0 98:40.0 99:14.0 100:224.0 101:33.0 103:200.0 104:33.0 106:45.0 107:192.0 108:47.0 109:78.0 110:94.0 112:8.0 113:5.0 115:674.0 117:107.0 118:11.0 119:157.0 120:188.0 121:292.0 122:6.0 123:119.0 124:474.0 125:93.0 126:572.0 131:25.0 132:158.0 133:1564.0 134:581.0 135:539.0 136:94.0 137:564.0 138:26.0 139:40.0 140:12.0 141:74.0 143:163.0 144:13.0 …
5576	300553	197	5576		86:228.0 88:26.0 89:24.0 90:18.0 92:14.0 95:24.0 99:190.0 100:170.0 101:3.0 102:72.0 104:50.0 105:3.0 106:23.0 107:235.0 108:61.0 109:33.0 110:40.0 111:12.0 117:10.0 127:131.0 129:543.0 131:90.0 134:70.0 136:37.0 143:1.0 147:248.0 148:35.0 149:378.0 153:1076.0 154:277.0 155:15.0 167:12.0 171:111.0 172:12.0 177:1018.0 178:26.0 183:8.0 184:42.0 197:1307.0 198:186.0 199:65.0 201:33.0 251:108.0 259:2…
5346	494094	85	5346		85:7160.0 86:479.0 89:69.0 97:155.0 98:302.0 99:2409.0 100:404.0 105:183.0 109:25.0 110:308.0 111:491.0 112:302.0 113:1202.0 124:17.0 125:204.0 126:263.0 127:329.0 136:24.0 139:55.0 140:68.0 141:172.0 154:89.0 155:512.0 156:158.0 158:15.0 168:46.0 169:350.0 170:38.0 184:23.0 203:23.0 369:14.0 372:21.0 379:13.0 396:13.0 398:16.0 418:18.0 426:18.0 428:18.0 430:15.0 455:13.0 460:13.0 466:20.0
4976	264730	198	4976		86:1130.0 89:441.0 90:254.0 91:125.0 92:14.0 93:467.0 94:14.0 96:169.0 97:100.0 100:365.0 104:171.0 106:169.0 107:464.0 108:72.0 110:78.0 114:29.0 116:101.0 118:9.0 120:773.0 121:55.0 122:38.0 124:7.0 125:46.0 126:232.0 128:30.0 130:567.0 131:55.0 133:3192.0 134:818.0 135:177.0 143:3.0 144:30.0 146:29.0 147:54.0 148:106.0 150:25.0 158:217.0 161:1.0 166:9.0 167:8.0 168:25.0 170:178.0 175:1.0 178:6…
4937	1200184	316	4937		89:95.0 91:1800.0 92:127.0 93:50.0 94:30.0 95:36.0 96:80.0 104:66.0 105:703.0 107:387.0 115:636.0 116:220.0 117:607.0 118:39.0 119:684.0 120:23.0 121:125.0 126:1.0 127:136.0 128:394.0 129:418.0 130:20.0 131:538.0 132:122.0 133:83.0 135:185.0 141:113.0 142:99.0 143:218.0 144:33.0 145:72.0 147:829.0 157:73.0 159:296.0 160:15.0 161:116.0 163:139.0 165:27.0 169:4.0 173:26.0 175:551.0 176:43.0 178:46.…
4819	915906	204	4819		91:27.0 96:22.0 101:198.0 103:1637.0 104:16.0 113:2.0 116:253.0 117:576.0 118:27.0 129:1046.0 133:196.0 142:17.0 143:79.0 145:93.0 147:1495.0 148:161.0 149:3.0 155:22.0 157:47.0 161:12.0 163:19.0 164:15.0 171:33.0 174:72.0 187:19.0 188:96.0 189:284.0 191:374.0 192:55.0 194:23.0 196:32.0 200:6.0 202:522.0 203:204.0 204:4723.0 205:1202.0 206:438.0 208:38.0 209:22.0 217:1232.0 218:334.0 219:28.0 227…
4795	784977	204	4795		86:19.0 91:795.0 92:140.0 93:772.0 94:293.0 95:501.0 99:70.0 100:336.0 101:381.0 102:39.0 103:1639.0 104:134.0 105:212.0 107:208.0 108:421.0 109:227.0 113:119.0 116:13.0 117:469.0 118:20.0 120:18.0 121:73.0 122:66.0 124:40.0 128:68.0 129:1178.0 130:214.0 131:2223.0 132:190.0 133:264.0 136:6.0 142:67.0 143:355.0 144:1675.0 145:372.0 146:242.0 147:1169.0 148:72.0 149:118.0 155:17.0 156:145.0 157:24…
4732	812184	204	4732		91:47.0 101:38.0 103:1234.0 105:3.0 113:1.0 115:220.0 117:184.0 124:6.0 131:11.0 133:12.0 135:2.0 136:43.0 138:2.0 142:50.0 143:140.0 145:2.0 147:47.0 148:1.0 150:2.0 153:12.0 156:215.0 157:41.0 160:37.0 161:9.0 162:3.0 163:21.0 169:155.0 174:3.0 179:44.0 180:15.0 183:1.0 189:100.0 190:15.0 191:273.0 192:144.0 193:4.0 194:17.0 202:6.0 203:46.0 204:4217.0 205:800.0 206:271.0 207:3.0 208:145.0 210:…
4713	939939	361	4713		85:11.0 86:223.0 87:917.0 89:1458.0 90:220.0 97:214.0 98:101.0 99:151.0 100:571.0 103:2564.0 104:358.0 105:824.0 106:262.0 108:94.0 110:85.0 112:63.0 113:504.0 116:317.0 117:3692.0 118:344.0 119:626.0 120:36.0 124:92.0 125:61.0 126:14.0 127:428.0 128:93.0 131:452.0 133:1552.0 139:285.0 141:237.0 143:717.0 144:261.0 145:386.0 146:162.0 147:6274.0 148:337.0 149:508.0 153:130.0 154:218.0 155:680.0 1…
4543	642404	157	4543		86:82.0 89:743.0 97:6.0 98:47.0 99:118.0 100:181.0 101:439.0 102:127.0 103:618.0 105:234.0 110:9.0 111:1.0 112:67.0 114:57.0 115:6.0 116:464.0 117:1165.0 118:4.0 128:80.0 129:1156.0 130:624.0 131:271.0 133:769.0 135:55.0 138:51.0 140:27.0 141:15.0 142:66.0 143:131.0 144:28.0 145:71.0 147:1805.0 148:298.0 149:177.0 154:25.0 156:25.0 157:3097.0 158:620.0 159:152.0 160:1278.0 161:695.0 162:109.0 163…
4541	630827	157	4541		85:66.0 86:291.0 87:2.0 88:2.0 89:1373.0 90:129.0 94:55.0 97:57.0 98:102.0 99:180.0 100:426.0 101:693.0 102:2082.0 103:3016.0 104:385.0 105:497.0 107:3.0 108:121.0 109:46.0 110:334.0 111:96.0 112:151.0 113:105.0 114:268.0 115:285.0 116:332.0 117:2553.0 118:234.0 119:170.0 121:5.0 122:8.0 125:10.0 126:76.0 127:33.0 128:119.0 129:2498.0 130:956.0 131:623.0 132:128.0 133:1311.0 134:28.0 135:50.0 136…
3442	474455	141	3442		85:410.0 86:73.0 88:9.0 89:13.0 91:15.0 92:64.0 94:27.0 95:180.0 96:55.0 97:242.0 103:23.0 110:469.0 111:197.0 112:26.0 113:18.0 114:32.0 116:66.0 117:135.0 119:14.0 121:3.0 122:2.0 126:13.0 127:6.0 128:172.0 132:3.0 133:24.0 134:62.0 135:2.0 140:37.0 141:3954.0 142:233.0 145:2.0 147:37.0 149:20.0 151:1.0 156:1.0 159:1.0 160:6.0 163:17.0 177:1.0 178:12.0 189:5.0 191:31.0 192:2.0 193:1.0 199:28.0 …
3173	517075	217	3173		85:84.0 86:33.0 88:82.0 89:182.0 97:32.0 98:150.0 99:653.0 100:70.0 101:227.0 102:112.0 103:1042.0 107:169.0 109:3.0 110:25.0 111:132.0 112:215.0 113:129.0 115:122.0 116:262.0 117:541.0 118:119.0 127:152.0 128:22.0 129:2292.0 130:601.0 131:298.0 133:684.0 134:4.0 135:31.0 143:886.0 144:57.0 147:1664.0 149:278.0 155:65.0 184:60.0 189:74.0 190:46.0 191:22.0 199:18.0 203:26.0 204:63.0 205:5.0 217:98…
3083	209514	85	3083		85:45584.0 86:3595.0 89:177.0 91:651.0 95:2372.0 96:1070.0 107:483.0 111:1958.0 120:87.0 133:712.0 140:45.0 150:39.0 154:239.0 159:155.0 161:75.0 163:143.0 164:36.0 165:101.0 174:99.0 176:39.0 177:202.0 179:12.0 185:31.0 189:191.0 191:775.0 192:318.0 193:291.0 203:31.0 207:6273.0 208:1199.0 209:728.0 210:117.0 211:10.0 215:26.0 222:49.0 223:16.0 229:46.0 231:41.0 240:33.0 241:13.0 243:16.0 247:99…
2944	214208	97	2944		85:530.0 91:2660.0 93:903.0 94:231.0 95:6120.0 96:4722.0 97:47603.0 98:4880.0 99:278.0 109:1344.0 112:5843.0 122:115.0 123:193.0 137:1754.0 138:158.0 140:396.0 150:34.0 154:1085.0 158:557.0 166:98.0 168:836.0 184:234.0 199:44.0 211:40.0 228:109.0 235:35.0 266:36.0 268:24.0 286:19.0 288:31.0 290:30.0 293:28.0 300:16.0 309:18.0 319:21.0 331:7.0 345:11.0 368:25.0 372:24.0 373:15.0 404:11.0 408:15.0 …
2821	538521	246	2821		85:366.0 86:96.0 87:518.0 89:2047.0 90:356.0 91:900.0 92:283.0 94:71.0 98:2.0 99:455.0 100:213.0 101:1275.0 102:4563.0 103:2724.0 104:464.0 105:189.0 106:315.0 107:120.0 111:212.0 113:539.0 114:123.0 115:512.0 116:925.0 117:11838.0 118:1220.0 119:959.0 120:583.0 125:45.0 127:184.0 128:116.0 129:1290.0 130:4071.0 131:1304.0 132:280.0 133:3798.0 134:610.0 135:337.0 139:11.0 142:69.0 143:833.0 144:1…
2097	254762	85	2097		85:50873.0 86:6329.0 91:1858.0 93:1314.0 95:3754.0 98:1061.0 99:343.0 100:862.0 101:566.0 102:235.0 103:846.0 107:370.0 109:1008.0 110:2290.0 113:897.0 115:170.0 118:407.0 120:457.0 121:170.0 127:323.0 131:1026.0 133:2224.0 134:3039.0 135:179.0 136:408.0 141:41.0 147:2222.0 148:207.0 149:307.0 151:23.0 158:59.0 160:178.0 161:317.0 168:857.0 172:19.0 174:22.0 184:473.0 185:58.0 190:34.0 198:15.0 2…
2095	230280	123	2095		86:217.0 91:2766.0 92:171.0 93:1050.0 94:191.0 95:4058.0 97:3616.0 99:310.0 101:163.0 103:84.0 105:375.0 107:645.0 108:320.0 109:1056.0 110:1026.0 112:14425.0 113:1951.0 116:240.0 117:192.0 119:170.0 120:54.0 121:100.0 123:3685.0 124:137.0 125:4861.0 126:1074.0 129:141.0 131:111.0 132:100.0 134:358.0 143:81.0 144:100.0 146:199.0 147:443.0 157:38.0 158:143.0 162:37.0 163:144.0 166:168.0 168:1033.0…
2081	242781	97	2081		89:82.0 91:1207.0 92:156.0 93:60.0 95:1209.0 96:2182.0 97:36686.0 98:3006.0 110:111.0 111:812.0 112:2848.0 130:34.0 131:183.0 168:2425.0 174:33.0 180:22.0 190:125.0 198:70.0 204:203.0 210:16.0 221:23.0 224:12.0 237:38.0 292:20.0 296:17.0 308:17.0 311:18.0 325:19.0 411:16.0 422:15.0 428:12.0 435:27.0 446:17.0 468:15.0 469:21.0 474:13.0 477:22.0 479:27.0 500:37.0
2061	250126	85	2061		85:187371.0 86:9781.0 87:49.0 89:139.0 91:6468.0 92:407.0 93:2549.0 94:615.0 95:11892.0 96:2126.0 97:8990.0 98:1516.0 99:261.0 103:66.0 105:500.0 107:167.0 108:73.0 109:2847.0 110:1903.0 112:270.0 113:313.0 114:136.0 115:85.0 119:253.0 120:118.0 121:52.0 123:282.0 124:96.0 127:235.0 128:41.0 131:84.0 133:137.0 134:101.0 137:133.0 138:92.0 140:236.0 141:10.0 146:330.0 148:248.0 152:15.0 155:220.0 …
2044	741417	174	2044		86:811.0 88:4.0 89:6.0 94:67.0 95:38.0 99:86.0 100:379.0 101:1.0 102:162.0 103:17.0 104:1.0 105:1.0 107:78.0 114:16.0 115:1.0 116:5.0 117:834.0 118:54.0 127:93.0 128:74.0 129:283.0 130:227.0 131:39.0 132:283.0 133:5.0 139:18.0 140:2.0 142:33.0 145:140.0 146:33.0 147:26.0 148:4.0 149:2.0 158:16.0 168:13.0 172:201.0 173:33.0 174:3953.0 175:685.0 176:248.0 189:1.0 191:1.0 204:15.0 207:1.0 214:2.0 21…
1913	307995	130	1913		86:1263.0 87:859.0 88:1533.0 89:3389.0 90:452.0 91:321.0 92:123.0 93:331.0 94:157.0 95:89.0 96:291.0 97:66.0 99:36.0 100:319.0 101:182.0 102:412.0 103:1038.0 104:512.0 105:1414.0 106:401.0 108:256.0 109:132.0 110:4372.0 111:129.0 113:184.0 114:1170.0 115:266.0 116:33.0 117:526.0 118:194.0 119:182.0 120:80.0 124:25.0 126:139.0 127:52.0 130:7720.0 131:1376.0 132:518.0 133:325.0 134:1084.0 135:169.0…
1878	573497	85	1878		85:3295.0 86:204.0 88:10.0 95:34.0 97:72.0 99:1047.0 106:25.0 107:30.0 110:49.0 111:222.0 112:177.0 113:658.0 114:2.0 120:5.0 125:64.0 126:65.0 127:386.0 128:41.0 137:15.0 141:134.0 142:2.0 153:46.0 154:8.0 155:181.0 158:3.0 166:11.0 167:12.0 168:18.0 173:8.0 182:12.0 197:82.0 203:4.0 207:1.0 212:19.0 226:21.0 236:3.0 240:9.0 242:6.0 254:20.0 259:4.0 260:2.0 270:12.0 284:33.0 286:32.0 292:9.0 312…
1875	592702	85	1875		85:3985.0 86:239.0 87:7.0 91:37.0 95:11.0 97:96.0 98:129.0 99:1320.0 111:232.0 112:119.0 113:744.0 114:66.0 116:7.0 121:11.0 123:25.0 125:84.0 126:21.0 127:457.0 128:3.0 135:28.0 136:25.0 138:36.0 141:216.0 142:15.0 153:23.0 154:68.0 155:234.0 156:11.0 162:5.0 165:5.0 168:7.0 169:127.0 170:13.0 172:27.0 182:3.0 183:46.0 184:17.0 185:7.0 189:24.0 195:7.0 197:131.0 198:7.0 206:15.0 212:10.0 218:9.0…
1872	471634	85	1872		85:4810.0 86:144.0 92:41.0 97:18.0 98:24.0 99:1189.0 100:64.0 107:119.0 111:152.0 112:149.0 113:643.0 126:1.0 127:324.0 128:1.0 141:5.0 145:14.0 155:124.0 169:6.0 184:29.0 495:15.0
1870	270185	119	1870		100:76.0 107:119.0 109:2.0 110:3.0 113:47.0 116:83.0 119:5774.0 120:662.0 121:322.0 127:17.0 129:4.0 130:1121.0 131:290.0 132:189.0 139:1.0 146:6030.0 161:601.0 162:393.0 177:134.0 184:48.0 233:321.0 234:13.0
1715	522196	217	1715		90:31.0 97:481.0 98:89.0 103:523.0 104:9.0 108:75.0 110:77.0 111:198.0 112:51.0 113:87.0 114:22.0 116:478.0 117:70.0 118:71.0 124:36.0 129:385.0 130:14.0 131:369.0 132:106.0 133:337.0 135:48.0 143:177.0 147:748.0 148:376.0 149:143.0 169:68.0 171:42.0 178:9.0 185:2.0 189:121.0 190:2.0 191:93.0 214:36.0 215:151.0 217:4267.0 218:897.0 219:366.0 220:20.0 225:6.0 226:7.0 227:29.0 230:74.0 231:2.0 239:…
1690	525027	204	1690		85:267.0 86:1.0 87:177.0 88:58.0 89:186.0 97:253.0 98:20.0 99:116.0 100:88.0 101:1989.0 102:67.0 103:1777.0 104:23.0 105:156.0 107:168.0 111:25.0 112:33.0 113:166.0 115:229.0 116:1289.0 117:1250.0 118:151.0 119:87.0 127:27.0 128:12.0 129:2427.0 130:123.0 131:1303.0 132:131.0 133:2316.0 134:16.0 140:71.0 141:150.0 142:54.0 143:1014.0 144:55.0 145:12.0 147:9915.0 148:1531.0 149:1494.0 151:26.0 156:…
1681	727279	204	1681		85:210.0 86:111.0 87:289.0 88:156.0 89:742.0 92:20.0 93:187.0 94:65.0 97:433.0 98:676.0 99:277.0 100:192.0 101:989.0 102:230.0 103:5184.0 104:432.0 105:215.0 107:286.0 108:21.0 109:69.0 110:157.0 111:189.0 112:51.0 113:389.0 114:32.0 115:411.0 116:884.0 117:2922.0 118:345.0 119:184.0 120:19.0 121:78.0 125:31.0 127:191.0 128:224.0 129:5018.0 130:635.0 131:1882.0 132:348.0 133:2964.0 134:545.0 135:…
1673	540033	217	1673		85:574.0 87:170.0 88:5.0 89:741.0 92:86.0 95:107.0 96:86.0 97:1417.0 98:79.0 99:841.0 101:4672.0 102:364.0 103:4626.0 104:481.0 105:338.0 106:10.0 109:151.0 110:200.0 111:535.0 112:104.0 113:401.0 114:112.0 115:1096.0 116:3061.0 117:3411.0 118:607.0 119:438.0 125:36.0 128:85.0 129:6528.0 130:698.0 131:2573.0 133:7145.0 134:174.0 135:1000.0 140:160.0 141:374.0 142:172.0 143:2551.0 144:304.0 145:33…
1173	239709	151	1173		85:1484.0 86:973.0 87:1788.0 88:856.0 89:410.0 90:111.0 92:84.0 96:292.0 97:192.0 98:163.0 100:519.0 101:220.0 102:858.0 103:2626.0 104:641.0 106:151.0 112:61.0 113:346.0 118:458.0 119:236.0 120:92.0 121:93.0 123:132.0 124:381.0 125:68.0 126:366.0 127:107.0 128:1367.0 129:381.0 130:2709.0 131:983.0 132:225.0 133:1233.0 135:598.0 137:405.0 138:40.0 139:84.0 140:33.0 144:108.0 146:2697.0 148:120.0 …
1064	594945	117	1064		85:2612.0 86:2545.0 87:45733.0 88:44013.0 89:24434.0 90:2017.0 91:921.0 92:316.0 93:118.0 94:54.0 96:90.0 97:224.0 98:50.0 99:2686.0 100:561.0 101:102529.0 102:14514.0 103:177816.0 104:15569.0 105:12095.0 106:376.0 107:279.0 111:97.0 112:59.0 113:42.0 114:436.0 115:8036.0 116:197720.0 117:393165.0 118:47689.0 119:23184.0 120:1128.0 121:155.0 127:44.0 129:270.0 130:264.0 131:5599.0 132:1056.0 133:…
892	478262	155	892		88:22.0 91:174.0 106:42.0 121:190.0 123:202.0 124:35.0 125:104.0 137:66.0 138:70.0 139:149.0 153:176.0 155:4152.0 156:191.0 157:122.0 171:1500.0 172:118.0 173:23.0 175:19.0 181:32.0 197:80.0 199:33.0 227:179.0 397:19.0 430:27.0 474:19.0 492:19.0
809	525759	149	809		85:459.0 91:136.0 93:1667.0 94:111.0 96:43.0 101:68.0 104:1377.0 105:1567.0 111:35.0 118:25.0 120:47.0 121:1233.0 122:533.0 123:75.0 125:20.0 132:159.0 134:109.0 135:78.0 140:53.0 141:28.0 144:23.0 149:12653.0 150:1387.0 167:20.0 175:31.0 176:990.0 177:1749.0 178:381.0 179:63.0 180:25.0 182:26.0 184:27.0 204:17.0 217:17.0 218:25.0 224:15.0 247:24.0 248:20.0 250:13.0 262:15.0 282:67.0 283:62.0 294…
657	227730	173	657		87:417.0 88:1864.0 89:109.0 99:135.0 100:41.0 101:551.0 103:1932.0 105:276.0 111:31.0 113:33.0 115:442.0 116:875.0 117:3523.0 129:942.0 131:2798.0 132:1334.0 133:3612.0 136:163.0 143:5278.0 144:752.0 145:830.0 147:27963.0 148:4490.0 149:3045.0 150:198.0 154:19.0 158:607.0 161:678.0 163:17.0 173:2865.0 174:305.0 177:2192.0 178:399.0 201:8.0 203:14.0 205:915.0 207:67.0 223:25.0 231:19.0 236:20.0 27…
257	1134576	441	257		91:3718.0 92:185.0 93:218.0 95:73.0 98:31.0 102:86.0 103:417.0 104:211.0 105:1803.0 107:683.0 115:1156.0 116:454.0 117:1167.0 118:189.0 119:1275.0 120:161.0 121:414.0 122:47.0 129:425.0 130:173.0 131:1267.0 132:403.0 133:813.0 134:148.0 135:229.0 141:119.0 142:95.0 143:156.0 144:121.0 145:221.0 147:5032.0 148:594.0 149:911.0 150:79.0 153:91.0 157:78.0 159:438.0 161:368.0 163:531.0 175:368.0 177:1…
168	878989	122	168		85:766.0 91:896.0 92:145.0 93:1368.0 94:1730.0 95:1772.0 96:3618.0 97:6361.0 98:1759.0 99:131.0 103:55.0 104:23.0 105:404.0 106:247.0 107:712.0 108:1348.0 109:747.0 110:2205.0 111:2234.0 112:1302.0 114:49.0 119:229.0 120:222.0 121:306.0 122:5497.0 123:1445.0 124:1560.0 125:862.0 126:347.0 128:42.0 129:33.0 130:36.0 132:25.0 133:231.0 134:281.0 135:236.0 136:4013.0 137:1139.0 138:966.0 139:309.0 1…
137	246162	204	137		85:280.0 86:863.0 87:415.0 88:205.0 90:120.0 100:239.0 101:103.0 102:415.0 103:1190.0 105:99.0 106:155.0 107:58.0 111:67.0 115:161.0 117:977.0 118:268.0 131:1230.0 132:256.0 133:749.0 136:65.0 143:24.0 147:26816.0 148:4288.0 149:1504.0 150:101.0 155:33.0 160:86.0 175:26.0 180:26.0 184:362.0 188:78.0 190:187.0 191:61.0 194:26.0 195:32.0 200:35.0 202:28.0 204:4031.0 205:466.0 206:177.0 219:180.0 22…
99	701191	204	99		85:118.0 86:161.0 87:84.0 88:46.0 89:2037.0 90:227.0 91:277.0 92:23.0 95:22.0 97:101.0 100:1289.0 101:594.0 102:568.0 103:1859.0 104:146.0 105:362.0 106:32.0 111:97.0 112:60.0 113:195.0 114:84.0 115:135.0 116:500.0 117:721.0 119:93.0 120:43.0 124:15.0 128:163.0 129:1856.0 130:328.0 131:644.0 132:325.0 133:1512.0 134:171.0 135:132.0 137:41.0 139:23.0 141:28.0 142:103.0 143:266.0 144:45.0 145:103.0…
91	221732	100	91		86:379.0 87:581.0 89:1002.0 90:211.0 99:101.0 100:5992.0 101:1275.0 103:802.0 104:929.0 105:199.0 106:77.0 116:205.0 119:491.0 120:111.0 132:300.0 146:35.0 147:10413.0 148:1705.0 149:820.0 150:49.0 166:86.0 171:61.0 182:15.0 190:2322.0 240:45.0 259:417.0 260:71.0 261:56.0 385:22.0 436:12.0
62	247887	85	62		85:10329.0 86:797.0 93:23.0 94:23.0 95:51.0 96:37.0 97:188.0 98:833.0 99:948.0 100:561.0 103:121.0 106:67.0 108:83.0 111:50.0 112:561.0 113:1229.0 114:175.0 126:398.0 127:1435.0 128:239.0 129:25.0 133:70.0 137:28.0 138:21.0 139:36.0 141:48.0 142:36.0 150:16.0 152:31.0 156:33.0 158:25.0 159:25.0 163:24.0 168:30.0 170:61.0 171:15.0 177:21.0 182:18.0 188:17.0 225:39.0 260:13.0 269:14.0 302:12.0 410:…
47	354110	85	47		85:9968.0 86:467.0 91:114.0 92:55.0 93:74.0 95:125.0 96:164.0 97:397.0 98:342.0 99:3775.0 100:402.0 101:33.0 106:65.0 111:243.0 112:411.0 113:1171.0 114:139.0 116:33.0 119:31.0 125:44.0 126:478.0 127:6349.0 131:292.0 132:81.0 134:100.0 136:25.0 140:178.0 141:96.0 149:147.0 153:47.0 154:73.0 155:396.0 156:50.0 169:123.0 170:26.0 181:40.0 182:21.0 186:15.0 193:40.0 195:35.0 196:19.0 205:39.0 208:28…
39	397287	97	39		85:1369.0 86:60.0 87:1902.0 88:75.0 89:239.0 90:86.0 91:228.0 92:122.0 93:30.0 94:25.0 95:625.0 96:508.0 97:14829.0 98:1197.0 99:564.0 101:33.0 102:64.0 104:34.0 109:2794.0 110:604.0 111:2648.0 112:266.0 113:732.0 114:679.0 115:10456.0 116:522.0 127:6875.0 128:2127.0 129:3349.0 130:179.0 131:262.0 132:21.0 138:14.0 139:14.0 141:74.0 143:23.0 144:88.0 145:8316.0 146:729.0 149:45.0 153:22.0 157:68.…
